# Supplementary material
Source: ML conference proceedings conference paper supplement (https://proceedings.neurips.cc/paper_files/paper/2022/hash/4f9342b74c3bb63f6e030d8263082ab6-Abstract.html)
Supplement: Supplementary file 1 [file 4f9342b74c3bb63f6e030d8263082ab6-Supplemental-Conference.zip]

Archive with 39 entries (37 files):
- supplementary/
- supplementary/.DS_Store
- __MACOSX/supplementary/._.DS_Store
- supplementary/code/
- __MACOSX/supplementary/._code
- supplementary/OD-LinBAI.pdf
- __MACOSX/supplementary/._OD-LinBAI.pdf
- supplementary/code/abalone.csv
- supplementary/code/many_sub_data_generator.m
- supplementary/code/updateR.m
- supplementary/code/HPC_dataset2_main1_P_2.m
- supplementary/code/fixed_confidence_main2.m
- supplementary/code/GSE.m
- supplementary/code/real_dataset_main.m
- supplementary/code/LTS.m
- supplementary/code/unit_test.m
- supplementary/code/usual_data_generator.m
- supplementary/code/BayesGap_Adaptive.m
- supplementary/code/dataset1_main1.m
- supplementary/code/minvol.m
- __MACOSX/supplementary/code/._minvol.m
- supplementary/code/LinearExploration.m
- supplementary/code/sphere_data_generator.m
- supplementary/code/HPC_dataset1_main2.m
- supplementary/code/dataset2_main2.m
- supplementary/code/data_stat.m
- supplementary/code/BayesGap_Oracle.m
- supplementary/code/XY_allocation.m
- supplementary/code/readme.txt
- __MACOSX/supplementary/code/._readme.txt
- supplementary/code/dataset1_main2.m
- supplementary/code/dataset2_main1.m
- supplementary/code/Sequential_Halving.m
- supplementary/code/HPC_dataset2_main1_P_3.m
- supplementary/code/myalgo.m
- supplementary/code/initwt.m
- supplementary/code/Peace.m
- supplementary/code/updatevar.m
- supplementary/code/real_data_generator.m
