# Supplementary material
Source: ML conference proceedings conference paper supplement (https://proceedings.neurips.cc/paper_files/paper/2022/hash/4f9342b74c3bb63f6e030d8263082ab6-Abstract.html)
Supplement: Supplementary file 1 [file 4f9342b74c3bb63f6e030d8263082ab6-Supplemental-Conference.zip › supplementary/code/abalone.csv]

0	0.455	0.365	0.095	0.514	0.2245	0.101	0.15	15
0	0.35	0.265	0.09	0.2255	0.0995	0.0485	0.07	7
1	0.53	0.42	0.135	0.677	0.2565	0.1415	0.21	9
0	0.44	0.365	0.125	0.516	0.2155	0.114	0.155	10
2	0.33	0.255	0.08	0.205	0.0895	0.0395	0.055	7
2	0.425	0.3	0.095	0.3515	0.141	0.0775	0.12	8
1	0.53	0.415	0.15	0.7775	0.237	0.1415	0.33	20
1	0.545	0.425	0.125	0.768	0.294	0.1495	0.26	16
0	0.475	0.37	0.125	0.5095	0.2165	0.1125	0.165	9
1	0.55	0.44	0.15	0.8945	0.3145	0.151	0.32	19
1	0.525	0.38	0.14	0.6065	0.194	0.1475	0.21	14
0	0.43	0.35	0.11	0.406	0.1675	0.081	0.135	10
0	0.49	0.38	0.135	0.5415	0.2175	0.095	0.19	11
1	0.535	0.405	0.145	0.6845	0.2725	0.171	0.205	10
1	0.47	0.355	0.1	0.4755	0.1675	0.0805	0.185	10
0	0.5	0.4	0.13	0.6645	0.258	0.133	0.24	12
2	0.355	0.28	0.085	0.2905	0.095	0.0395	0.115	7
1	0.44	0.34	0.1	0.451	0.188	0.087	0.13	10
0	0.365	0.295	0.08	0.2555	0.097	0.043	0.1	7
0	0.45	0.32	0.1	0.381	0.1705	0.075	0.115	9
0	0.355	0.28	0.095	0.2455	0.0955	0.062	0.075	11
2	0.38	0.275	0.1	0.2255	0.08	0.049	0.085	10
1	0.565	0.44	0.155	0.9395	0.4275	0.214	0.27	12
1	0.55	0.415	0.135	0.7635	0.318	0.21	0.2	9
1	0.615	0.48	0.165	1.1615	0.513	0.301	0.305	10
1	0.56	0.44	0.14	0.9285	0.3825	0.188	0.3	11
1	0.58	0.45	0.185	0.9955	0.3945	0.272	0.285	11
0	0.59	0.445	0.14	0.931	0.356	0.234	0.28	12
0	0.605	0.475	0.18	0.9365	0.394	0.219	0.295	15
0	0.575	0.425	0.14	0.8635	0.393	0.227	0.2	11
0	0.58	0.47	0.165	0.9975	0.3935	0.242	0.33	10
1	0.68	0.56	0.165	1.639	0.6055	0.2805	0.46	15
0	0.665	0.525	0.165	1.338	0.5515	0.3575	0.35	18
1	0.68	0.55	0.175	1.798	0.815	0.3925	0.455	19
1	0.705	0.55	0.2	1.7095	0.633	0.4115	0.49	13
0	0.465	0.355	0.105	0.4795	0.227	0.124	0.125	8
1	0.54	0.475	0.155	1.217	0.5305	0.3075	0.34	16
1	0.45	0.355	0.105	0.5225	0.237	0.1165	0.145	8
1	0.575	0.445	0.135	0.883	0.381	0.2035	0.26	11
0	0.355	0.29	0.09	0.3275	0.134	0.086	0.09	9
1	0.45	0.335	0.105	0.425	0.1865	0.091	0.115	9
1	0.55	0.425	0.135	0.8515	0.362	0.196	0.27	14
2	0.24	0.175	0.045	0.07	0.0315	0.0235	0.02	5
2	0.205	0.15	0.055	0.042	0.0255	0.015	0.012	5
2	0.21	0.15	0.05	0.042	0.0175	0.0125	0.015	4
2	0.39	0.295	0.095	0.203	0.0875	0.045	0.075	7
0	0.47	0.37	0.12	0.5795	0.293	0.227	0.14	9
1	0.46	0.375	0.12	0.4605	0.1775	0.11	0.15	7
2	0.325	0.245	0.07	0.161	0.0755	0.0255	0.045	6
1	0.525	0.425	0.16	0.8355	0.3545	0.2135	0.245	9
2	0.52	0.41	0.12	0.595	0.2385	0.111	0.19	8
0	0.4	0.32	0.095	0.303	0.1335	0.06	0.1	7
0	0.485	0.36	0.13	0.5415	0.2595	0.096	0.16	10
1	0.47	0.36	0.12	0.4775	0.2105	0.1055	0.15	10
0	0.405	0.31	0.1	0.385	0.173	0.0915	0.11	7
1	0.5	0.4	0.14	0.6615	0.2565	0.1755	0.22	8
0	0.445	0.35	0.12	0.4425	0.192	0.0955	0.135	8
0	0.47	0.385	0.135	0.5895	0.2765	0.12	0.17	8
2	0.245	0.19	0.06	0.086	0.042	0.014	0.025	4
1	0.505	0.4	0.125	0.583	0.246	0.13	0.175	7
0	0.45	0.345	0.105	0.4115	0.18	0.1125	0.135	7
0	0.505	0.405	0.11	0.625	0.305	0.16	0.175	9
1	0.53	0.41	0.13	0.6965	0.302	0.1935	0.2	10
0	0.425	0.325	0.095	0.3785	0.1705	0.08	0.1	7
0	0.52	0.4	0.12	0.58	0.234	0.1315	0.185	8
0	0.475	0.355	0.12	0.48	0.234	0.1015	0.135	8
1	0.565	0.44	0.16	0.915	0.354	0.1935	0.32	12
1	0.595	0.495	0.185	1.285	0.416	0.224	0.485	13
1	0.475	0.39	0.12	0.5305	0.2135	0.1155	0.17	10
2	0.31	0.235	0.07	0.151	0.063	0.0405	0.045	6
0	0.555	0.425	0.13	0.7665	0.264	0.168	0.275	13
1	0.4	0.32	0.11	0.353	0.1405	0.0985	0.1	8
1	0.595	0.475	0.17	1.247	0.48	0.225	0.425	20
0	0.57	0.48	0.175	1.185	0.474	0.261	0.38	11
1	0.605	0.45	0.195	1.098	0.481	0.2895	0.315	13
1	0.6	0.475	0.15	1.0075	0.4425	0.221	0.28	15
0	0.595	0.475	0.14	0.944	0.3625	0.189	0.315	9
1	0.6	0.47	0.15	0.922	0.363	0.194	0.305	10
1	0.555	0.425	0.14	0.788	0.282	0.1595	0.285	11
1	0.615	0.475	0.17	1.1025	0.4695	0.2355	0.345	14
1	0.575	0.445	0.14	0.941	0.3845	0.252	0.285	9
0	0.62	0.51	0.175	1.615	0.5105	0.192	0.675	12
1	0.52	0.425	0.165	0.9885	0.396	0.225	0.32	16
0	0.595	0.475	0.16	1.3175	0.408	0.234	0.58	21
0	0.58	0.45	0.14	1.013	0.38	0.216	0.36	14
1	0.57	0.465	0.18	1.295	0.339	0.2225	0.44	12
0	0.625	0.465	0.14	1.195	0.4825	0.205	0.4	13
0	0.56	0.44	0.16	0.8645	0.3305	0.2075	0.26	10
1	0.46	0.355	0.13	0.517	0.2205	0.114	0.165	9
1	0.575	0.45	0.16	0.9775	0.3135	0.231	0.33	12
0	0.565	0.425	0.135	0.8115	0.341	0.1675	0.255	15
0	0.555	0.44	0.15	0.755	0.307	0.1525	0.26	12
0	0.595	0.465	0.175	1.115	0.4015	0.254	0.39	13
1	0.625	0.495	0.165	1.262	0.507	0.318	0.39	10
0	0.695	0.56	0.19	1.494	0.588	0.3425	0.485	15
0	0.665	0.535	0.195	1.606	0.5755	0.388	0.48	14
0	0.535	0.435	0.15	0.725	0.269	0.1385	0.25	9
0	0.47	0.375	0.13	0.523	0.214	0.132	0.145	8
0	0.47	0.37	0.13	0.5225	0.201	0.133	0.165	7
1	0.475	0.375	0.125	0.5785	0.2775	0.085	0.155	10
2	0.36	0.265	0.095	0.2315	0.105	0.046	0.075	7
0	0.55	0.435	0.145	0.843	0.328	0.1915	0.255	15
0	0.53	0.435	0.16	0.883	0.316	0.164	0.335	15
0	0.53	0.415	0.14	0.724	0.3105	0.1675	0.205	10
0	0.605	0.47	0.16	1.1735	0.4975	0.2405	0.345	12
1	0.52	0.41	0.155	0.727	0.291	0.1835	0.235	12
1	0.545	0.43	0.165	0.802	0.2935	0.183	0.28	11
1	0.5	0.4	0.125	0.6675	0.261	0.1315	0.22	10
1	0.51	0.39	0.135	0.6335	0.231	0.179	0.2	9
1	0.435	0.395	0.105	0.3635	0.136	0.098	0.13	9
0	0.495	0.395	0.125	0.5415	0.2375	0.1345	0.155	9
0	0.465	0.36	0.105	0.431	0.172	0.107	0.175	9
2	0.435	0.32	0.08	0.3325	0.1485	0.0635	0.105	9
0	0.425	0.35	0.105	0.393	0.13	0.063	0.165	9
1	0.545	0.41	0.125	0.6935	0.2975	0.146	0.21	11
1	0.53	0.415	0.115	0.5915	0.233	0.1585	0.18	11
1	0.49	0.375	0.135	0.6125	0.2555	0.102	0.22	11
0	0.44	0.34	0.105	0.402	0.1305	0.0955	0.165	10
1	0.56	0.43	0.15	0.8825	0.3465	0.172	0.31	9
0	0.405	0.305	0.085	0.2605	0.1145	0.0595	0.085	8
1	0.47	0.365	0.105	0.4205	0.163	0.1035	0.14	9
2	0.385	0.295	0.085	0.2535	0.103	0.0575	0.085	7
1	0.515	0.425	0.14	0.766	0.304	0.1725	0.255	14
0	0.37	0.265	0.075	0.214	0.09	0.051	0.07	6
2	0.36	0.28	0.08	0.1755	0.081	0.0505	0.07	6
2	0.27	0.195	0.06	0.073	0.0285	0.0235	0.03	5
2	0.375	0.275	0.09	0.238	0.1075	0.0545	0.07	6
2	0.385	0.29	0.085	0.2505	0.112	0.061	0.08	8
0	0.7	0.535	0.16	1.7255	0.63	0.2635	0.54	19
0	0.71	0.54	0.165	1.959	0.7665	0.261	0.78	18
0	0.595	0.48	0.165	1.262	0.4835	0.283	0.41	17
1	0.44	0.35	0.125	0.4035	0.175	0.063	0.129	9
1	0.325	0.26	0.09	0.1915	0.085	0.036	0.062	7
2	0.35	0.26	0.095	0.211	0.086	0.056	0.068	7
2	0.265	0.2	0.065	0.0975	0.04	0.0205	0.028	7
1	0.425	0.33	0.115	0.406	0.1635	0.081	0.1355	8
1	0.305	0.23	0.08	0.156	0.0675	0.0345	0.048	7
0	0.345	0.255	0.09	0.2005	0.094	0.0295	0.063	9
1	0.405	0.325	0.11	0.3555	0.151	0.063	0.117	9
0	0.375	0.285	0.095	0.253	0.096	0.0575	0.0925	9
1	0.565	0.445	0.155	0.826	0.341	0.2055	0.2475	10
1	0.55	0.45	0.145	0.741	0.295	0.1435	0.2665	10
0	0.65	0.52	0.19	1.3445	0.519	0.306	0.4465	16
0	0.56	0.455	0.155	0.797	0.34	0.19	0.2425	11
0	0.475	0.375	0.13	0.5175	0.2075	0.1165	0.17	10
1	0.49	0.38	0.125	0.549	0.245	0.1075	0.174	10
0	0.46	0.35	0.12	0.515	0.224	0.108	0.1565	10
2	0.28	0.205	0.08	0.127	0.052	0.039	0.042	9
2	0.175	0.13	0.055	0.0315	0.0105	0.0065	0.0125	5
2	0.17	0.13	0.095	0.03	0.013	0.008	0.01	4
0	0.59	0.475	0.145	1.053	0.4415	0.262	0.325	15
1	0.605	0.5	0.185	1.1185	0.469	0.2585	0.335	9
1	0.635	0.515	0.19	1.3715	0.5065	0.305	0.45	10
1	0.605	0.485	0.16	1.0565	0.37	0.2355	0.355	10
1	0.565	0.45	0.135	0.9885	0.387	0.1495	0.31	12
0	0.515	0.405	0.13	0.722	0.32	0.131	0.21	10
1	0.575	0.46	0.19	0.994	0.392	0.2425	0.34	13
0	0.645	0.485	0.215	1.514	0.546	0.2615	0.635	16
1	0.58	0.455	0.17	0.9075	0.374	0.2135	0.285	13
1	0.575	0.46	0.165	1.124	0.2985	0.1785	0.44	13
0	0.605	0.465	0.165	1.056	0.4215	0.2475	0.34	13
1	0.605	0.485	0.16	1.222	0.53	0.2575	0.28	13
0	0.61	0.485	0.175	1.2445	0.544	0.297	0.345	12
1	0.725	0.56	0.21	2.141	0.65	0.398	1.005	18
1	0.65	0.545	0.23	1.752	0.5605	0.2895	0.815	16
0	0.725	0.57	0.19	2.55	1.0705	0.483	0.725	14
1	0.725	0.575	0.175	2.124	0.765	0.4515	0.85	20
1	0.68	0.57	0.205	1.842	0.625	0.408	0.65	20
0	0.705	0.56	0.22	1.981	0.8175	0.3085	0.76	14
1	0.68	0.515	0.175	1.6185	0.5125	0.409	0.62	12
0	0.695	0.55	0.215	1.9565	0.7125	0.541	0.59	14
1	0.53	0.395	0.145	0.775	0.308	0.169	0.255	7
0	0.525	0.435	0.155	1.065	0.486	0.233	0.285	8
1	0.52	0.405	0.115	0.776	0.32	0.1845	0.22	8
2	0.235	0.16	0.04	0.048	0.0185	0.018	0.015	5
2	0.36	0.26	0.09	0.1785	0.0645	0.037	0.075	7
2	0.315	0.21	0.06	0.125	0.06	0.0375	0.035	5
2	0.315	0.245	0.085	0.1435	0.053	0.0475	0.05	8
2	0.225	0.16	0.045	0.0465	0.025	0.015	0.015	4
0	0.58	0.475	0.15	0.97	0.385	0.2165	0.35	11
0	0.57	0.48	0.18	0.9395	0.399	0.2	0.295	14
0	0.64	0.51	0.175	1.368	0.515	0.266	0.57	21
1	0.56	0.45	0.16	1.0235	0.429	0.268	0.3	10
1	0.62	0.475	0.175	1.0165	0.4355	0.214	0.325	10
1	0.645	0.51	0.2	1.5675	0.621	0.367	0.46	12
0	0.62	0.49	0.19	1.218	0.5455	0.2965	0.355	13
1	0.63	0.48	0.15	1.0525	0.392	0.336	0.285	12
1	0.63	0.5	0.185	1.383	0.54	0.3315	0.38	10
1	0.63	0.48	0.16	1.199	0.5265	0.335	0.315	11
1	0.585	0.46	0.17	0.9325	0.365	0.271	0.29	9
0	0.615	0.48	0.18	1.1595	0.4845	0.2165	0.325	13
0	0.61	0.485	0.17	1.0225	0.419	0.2405	0.36	12
0	0.58	0.45	0.15	0.927	0.276	0.1815	0.36	14
2	0.355	0.275	0.085	0.22	0.092	0.06	0.15	8
1	0.51	0.4	0.14	0.8145	0.459	0.1965	0.195	10
0	0.5	0.405	0.155	0.772	0.346	0.1535	0.245	12
1	0.505	0.41	0.15	0.644	0.285	0.145	0.21	11
0	0.64	0.5	0.185	1.3035	0.4445	0.2635	0.465	16
0	0.56	0.45	0.16	0.922	0.432	0.178	0.26	15
0	0.585	0.46	0.185	0.922	0.3635	0.213	0.285	10
1	0.45	0.345	0.12	0.4165	0.1655	0.095	0.135	9
0	0.5	0.4	0.165	0.825	0.254	0.205	0.285	13
1	0.5	0.4	0.145	0.63	0.234	0.1465	0.23	12
1	0.53	0.435	0.17	0.8155	0.2985	0.155	0.275	13
0	0.42	0.335	0.115	0.369	0.171	0.071	0.12	8
1	0.44	0.34	0.14	0.482	0.186	0.1085	0.16	9
2	0.4	0.3	0.11	0.315	0.109	0.067	0.12	9
2	0.435	0.34	0.11	0.3795	0.1495	0.085	0.12	8
1	0.525	0.415	0.17	0.8325	0.2755	0.1685	0.31	13
2	0.37	0.28	0.095	0.2655	0.122	0.052	0.08	7
1	0.49	0.365	0.145	0.6345	0.1995	0.1625	0.22	10
0	0.335	0.25	0.09	0.181	0.0755	0.0415	0.06	7
1	0.415	0.325	0.105	0.38	0.1595	0.0785	0.12	12
0	0.5	0.405	0.14	0.6155	0.241	0.1355	0.205	9
1	0.485	0.395	0.16	0.66	0.2475	0.128	0.235	14
0	0.55	0.405	0.14	0.8025	0.244	0.1635	0.255	10
0	0.45	0.35	0.13	0.46	0.174	0.111	0.135	8
2	0.405	0.3	0.12	0.324	0.1265	0.07	0.11	7
0	0.47	0.36	0.135	0.501	0.1665	0.115	0.165	10
1	0.415	0.305	0.13	0.32	0.1305	0.0755	0.105	8
1	0.445	0.325	0.125	0.455	0.1785	0.1125	0.14	9
1	0.47	0.35	0.145	0.5175	0.187	0.1235	0.18	11
1	0.49	0.375	0.15	0.5755	0.22	0.144	0.19	9
1	0.445	0.355	0.15	0.485	0.181	0.125	0.155	11
2	0.425	0.38	0.105	0.3265	0.1285	0.0785	0.1	10
1	0.5	0.37	0.135	0.45	0.1715	0.1055	0.155	9
1	0.39	0.29	0.125	0.3055	0.121	0.082	0.09	7
2	0.365	0.27	0.085	0.205	0.078	0.0485	0.07	7
1	0.58	0.465	0.165	1.1015	0.404	0.2095	0.35	11
1	0.53	0.415	0.16	0.783	0.2935	0.158	0.245	15
0	0.555	0.445	0.135	0.836	0.336	0.1625	0.275	13
0	0.565	0.44	0.175	0.9025	0.31	0.193	0.325	14
0	0.625	0.505	0.215	1.4455	0.496	0.287	0.435	22
2	0.275	0.215	0.075	0.1155	0.0485	0.029	0.035	7
2	0.44	0.35	0.135	0.435	0.1815	0.083	0.125	12
2	0.295	0.225	0.08	0.124	0.0485	0.032	0.04	9
2	0.075	0.055	0.01	0.002	0.001	0.0005	0.0015	1
2	0.13	0.1	0.03	0.013	0.0045	0.003	0.004	3
2	0.11	0.09	0.03	0.008	0.0025	0.002	0.003	3
2	0.16	0.12	0.035	0.021	0.0075	0.0045	0.005	5
0	0.565	0.425	0.16	0.9425	0.3495	0.2185	0.275	17
2	0.27	0.2	0.07	0.1	0.034	0.0245	0.035	5
2	0.23	0.175	0.065	0.0645	0.026	0.0105	0.02	5
2	0.3	0.23	0.08	0.1275	0.0435	0.0265	0.04	8
2	0.33	0.255	0.085	0.1655	0.063	0.039	0.06	8
2	0.35	0.26	0.085	0.174	0.0705	0.0345	0.06	10
2	0.32	0.245	0.08	0.1585	0.0635	0.0325	0.05	13
2	0.36	0.275	0.085	0.1975	0.0745	0.0415	0.07	9
2	0.305	0.245	0.075	0.156	0.0675	0.038	0.045	7
2	0.345	0.27	0.11	0.2135	0.082	0.0545	0.07	7
2	0.33	0.25	0.105	0.1715	0.0655	0.035	0.06	7
0	0.59	0.47	0.18	1.1235	0.4205	0.2805	0.36	13
1	0.595	0.455	0.155	1.0605	0.5135	0.2165	0.3	12
1	0.575	0.46	0.185	1.094	0.4485	0.217	0.345	15
0	0.6	0.495	0.165	1.2415	0.485	0.2775	0.34	15
0	0.56	0.45	0.175	1.011	0.3835	0.2065	0.37	15
0	0.56	0.45	0.185	1.07	0.3805	0.175	0.41	19
0	0.545	0.46	0.16	0.8975	0.341	0.1655	0.345	10
1	0.635	0.505	0.17	1.415	0.605	0.297	0.365	15
1	0.59	0.475	0.16	1.1015	0.4775	0.2555	0.295	13
1	0.54	0.475	0.155	0.928	0.394	0.194	0.26	11
1	0.57	0.44	0.125	0.865	0.3675	0.1725	0.27	12
0	0.53	0.42	0.165	0.8945	0.319	0.239	0.245	11
2	0.245	0.195	0.06	0.095	0.0445	0.0245	0.026	4
0	0.27	0.2	0.08	0.1205	0.0465	0.028	0.04	6
1	0.46	0.38	0.13	0.639	0.3	0.1525	0.16	11
0	0.52	0.45	0.15	0.895	0.3615	0.186	0.235	14
0	0.35	0.275	0.11	0.2925	0.1225	0.0635	0.0905	8
0	0.47	0.39	0.15	0.6355	0.2185	0.0885	0.255	9
1	0.45	0.36	0.125	0.4995	0.2035	0.1	0.17	13
1	0.64	0.525	0.215	1.779	0.4535	0.2855	0.55	22
0	0.59	0.5	0.2	1.187	0.412	0.2705	0.37	16
0	0.62	0.485	0.205	1.219	0.3875	0.2505	0.385	14
0	0.63	0.505	0.225	1.525	0.56	0.3335	0.45	15
0	0.63	0.515	0.155	1.259	0.4105	0.197	0.41	13
0	0.655	0.54	0.215	1.844	0.7425	0.327	0.585	22
1	0.66	0.53	0.185	1.3485	0.493	0.245	0.49	12
0	0.61	0.5	0.24	1.642	0.532	0.3345	0.69	18
0	0.635	0.525	0.205	1.484	0.55	0.3115	0.43	20
1	0.515	0.425	0.135	0.712	0.2665	0.1605	0.25	11
1	0.535	0.415	0.185	0.8415	0.314	0.1585	0.3	15
2	0.36	0.285	0.105	0.2415	0.0915	0.057	0.075	7
1	0.455	0.355	0.12	0.4495	0.177	0.104	0.15	9
0	0.485	0.395	0.14	0.6295	0.2285	0.127	0.225	14
0	0.515	0.38	0.175	0.9565	0.325	0.158	0.31	14
1	0.535	0.415	0.17	0.879	0.295	0.1965	0.285	10
0	0.53	0.435	0.155	0.699	0.288	0.1595	0.205	10
1	0.495	0.4	0.155	0.6445	0.242	0.1325	0.205	17
0	0.44	0.355	0.125	0.4775	0.132	0.0815	0.19	9
1	0.535	0.435	0.16	0.8105	0.3155	0.1795	0.24	10
0	0.54	0.435	0.18	0.996	0.3835	0.226	0.325	17
1	0.565	0.505	0.21	1.2765	0.501	0.279	0.355	12
0	0.61	0.475	0.165	1.116	0.428	0.2205	0.315	15
1	0.565	0.455	0.175	1.013	0.342	0.207	0.35	19
0	0.6	0.495	0.195	1.0575	0.384	0.19	0.375	26
2	0.295	0.215	0.085	0.128	0.049	0.034	0.04	6
2	0.275	0.205	0.075	0.1105	0.045	0.0285	0.035	6
2	0.28	0.21	0.085	0.1065	0.039	0.0295	0.03	4
0	0.49	0.395	0.14	0.549	0.2215	0.1275	0.15	11
0	0.37	0.28	0.105	0.234	0.0905	0.0585	0.075	9
1	0.405	0.305	0.095	0.3485	0.1455	0.0895	0.1	9
1	0.54	0.435	0.175	0.892	0.322	0.174	0.335	13
0	0.37	0.28	0.1	0.252	0.1065	0.0595	0.074	8
0	0.36	0.27	0.1	0.217	0.0885	0.0495	0.0715	6
1	0.47	0.36	0.13	0.472	0.182	0.114	0.15	10
2	0.2	0.145	0.06	0.037	0.0125	0.0095	0.011	4
2	0.165	0.12	0.03	0.0215	0.007	0.005	0.005	3
0	0.645	0.515	0.24	1.5415	0.471	0.369	0.535	13
0	0.55	0.41	0.125	0.7605	0.2505	0.1635	0.195	14
0	0.57	0.435	0.145	0.9055	0.3925	0.2355	0.275	10
1	0.63	0.485	0.19	1.2435	0.4635	0.3055	0.39	21
0	0.56	0.44	0.14	0.971	0.443	0.2045	0.265	14
0	0.595	0.455	0.195	1.3305	0.4595	0.3235	0.345	19
1	0.62	0.47	0.2	1.2255	0.381	0.27	0.435	23
0	0.63	0.485	0.175	1.3	0.4335	0.2945	0.46	23
2	0.45	0.355	0.11	0.4585	0.194	0.067	0.14	8
1	0.635	0.535	0.19	1.242	0.576	0.2475	0.39	14
0	0.45	0.35	0.1	0.3675	0.1465	0.1015	0.12	10
1	0.58	0.455	0.155	0.8365	0.315	0.1385	0.32	18
2	0.33	0.255	0.095	0.172	0.066	0.0255	0.06	6
2	0.265	0.21	0.06	0.0965	0.0425	0.022	0.03	5
2	0.19	0.145	0.04	0.038	0.0165	0.0065	0.015	4
0	0.385	0.31	0.1	0.2845	0.1065	0.075	0.1	11
2	0.265	0.205	0.07	0.1055	0.039	0.041	0.035	5
0	0.335	0.265	0.105	0.222	0.0935	0.056	0.075	7
2	0.355	0.275	0.09	0.251	0.097	0.053	0.08	7
2	0.32	0.255	0.1	0.1755	0.073	0.0415	0.065	7
0	0.51	0.4	0.13	0.6435	0.27	0.1665	0.205	12
0	0.36	0.295	0.105	0.241	0.0865	0.053	0.095	8
2	0.36	0.28	0.09	0.2255	0.0885	0.04	0.09	8
0	0.5	0.38	0.155	0.5955	0.2135	0.161	0.2	12
1	0.4	0.325	0.12	0.3185	0.134	0.0565	0.095	8
2	0.3	0.22	0.08	0.121	0.0475	0.042	0.035	5
2	0.235	0.175	0.04	0.0705	0.0335	0.015	0.02	5
1	0.74	0.6	0.195	1.974	0.598	0.4085	0.71	16
0	0.62	0.465	0.19	1.3415	0.5705	0.3175	0.355	11
0	0.6	0.475	0.19	1.0875	0.403	0.2655	0.325	14
0	0.59	0.45	0.185	1.283	0.473	0.276	0.425	16
0	0.62	0.475	0.185	1.325	0.6045	0.325	0.33	13
1	0.565	0.45	0.195	1.0035	0.406	0.2505	0.285	15
0	0.575	0.455	0.145	1.165	0.581	0.2275	0.3	14
1	0.62	0.51	0.205	1.3475	0.4775	0.2565	0.48	14
0	0.62	0.465	0.185	1.274	0.579	0.3065	0.32	12
1	0.505	0.375	0.18	0.568	0.2325	0.1495	0.17	12
1	0.46	0.425	0.155	0.746	0.3005	0.152	0.24	8
0	0.49	0.39	0.14	0.707	0.2795	0.2185	0.18	13
1	0.525	0.42	0.16	0.756	0.2745	0.173	0.275	9
2	0.34	0.26	0.08	0.2	0.08	0.0555	0.055	6
2	0.375	0.305	0.115	0.2715	0.092	0.074	0.09	8
0	0.61	0.48	0.15	1.2	0.56	0.2455	0.28	14
1	0.61	0.495	0.185	1.153	0.536	0.2905	0.245	8
1	0.585	0.45	0.17	0.8685	0.3325	0.1635	0.27	22
0	0.57	0.46	0.14	0.9535	0.4465	0.2065	0.245	12
0	0.58	0.455	0.17	0.93	0.408	0.259	0.22	9
0	0.635	0.515	0.17	1.275	0.509	0.286	0.34	16
0	0.7	0.58	0.205	2.13	0.7415	0.49	0.58	20
0	0.675	0.525	0.185	1.587	0.6935	0.336	0.395	13
1	0.645	0.525	0.19	1.8085	0.7035	0.3885	0.395	18
0	0.745	0.585	0.215	2.499	0.9265	0.472	0.7	17
1	0.685	0.545	0.18	1.768	0.7495	0.392	0.485	16
0	0.605	0.49	0.18	1.227	0.48	0.287	0.35	18
1	0.59	0.465	0.15	0.997	0.392	0.246	0.34	12
1	0.65	0.525	0.175	1.4225	0.61	0.2995	0.445	20
1	0.6	0.48	0.15	1.029	0.4085	0.2705	0.295	16
1	0.62	0.5	0.175	1.186	0.4985	0.3015	0.35	12
0	0.63	0.515	0.16	1.016	0.4215	0.244	0.355	19
0	0.58	0.465	0.145	0.887	0.4405	0.1655	0.265	11
1	0.58	0.455	0.12	1.0735	0.479	0.2735	0.265	10
0	0.63	0.49	0.18	1.13	0.458	0.2765	0.315	12
1	0.69	0.56	0.215	1.719	0.68	0.299	0.47	17
1	0.65	0.545	0.165	1.566	0.6645	0.3455	0.415	16
1	0.66	0.565	0.195	1.7605	0.692	0.3265	0.5	16
1	0.68	0.58	0.2	1.787	0.585	0.453	0.6	19
1	0.7	0.575	0.17	1.31	0.5095	0.314	0.42	14
0	0.685	0.52	0.15	1.343	0.4635	0.292	0.4	13
1	0.675	0.545	0.195	1.7345	0.6845	0.3695	0.605	20
0	0.63	0.49	0.19	1.1775	0.4935	0.3365	0.285	11
1	0.585	0.45	0.16	1.077	0.4995	0.2875	0.25	10
0	0.565	0.465	0.175	0.995	0.3895	0.183	0.37	15
1	0.61	0.495	0.185	1.1085	0.3705	0.3135	0.33	12
0	0.605	0.47	0.18	1.1405	0.3755	0.2805	0.385	15
0	0.535	0.42	0.145	0.791	0.33	0.189	0.25	10
0	0.485	0.4	0.135	0.663	0.313	0.137	0.2	10
0	0.47	0.375	0.12	0.5565	0.226	0.122	0.195	12
0	0.545	0.425	0.135	0.8445	0.373	0.21	0.235	10
1	0.455	0.37	0.105	0.4925	0.216	0.1245	0.135	9
0	0.54	0.42	0.155	0.7385	0.3515	0.152	0.215	12
0	0.46	0.38	0.135	0.482	0.207	0.1225	0.145	10
0	0.49	0.42	0.125	0.609	0.239	0.1435	0.22	14
2	0.465	0.375	0.12	0.471	0.222	0.119	0.14	9
2	0.415	0.325	0.1	0.3215	0.1535	0.0595	0.105	10
0	0.475	0.375	0.125	0.593	0.277	0.115	0.18	10
1	0.47	0.375	0.125	0.5615	0.252	0.137	0.18	10
2	0.365	0.295	0.095	0.25	0.1075	0.0545	0.08	9
2	0.345	0.275	0.095	0.1995	0.0755	0.0535	0.07	6
2	0.39	0.31	0.1	0.302	0.116	0.064	0.115	11
1	0.5	0.395	0.14	0.7155	0.3165	0.176	0.24	10
0	0.47	0.38	0.145	0.5865	0.2385	0.144	0.185	8
0	0.535	0.44	0.15	0.6765	0.256	0.139	0.26	12
0	0.585	0.455	0.15	0.987	0.4355	0.2075	0.31	11
1	0.485	0.365	0.12	0.5885	0.27	0.131	0.175	9
0	0.515	0.455	0.135	0.7225	0.295	0.1625	0.235	9
1	0.435	0.325	0.11	0.4335	0.178	0.0985	0.155	7
1	0.515	0.415	0.14	0.6935	0.3115	0.152	0.2	10
2	0.44	0.345	0.12	0.365	0.1655	0.083	0.11	7
1	0.525	0.44	0.15	0.8425	0.3685	0.1985	0.24	12
0	0.45	0.355	0.115	0.479	0.2125	0.1045	0.15	8
0	0.59	0.485	0.12	0.911	0.39	0.182	0.29	16
0	0.555	0.45	0.145	0.915	0.4	0.246	0.285	11
0	0.57	0.44	0.095	0.827	0.3395	0.2215	0.235	8
0	0.59	0.5	0.165	1.1045	0.4565	0.2425	0.34	15
0	0.585	0.475	0.12	0.945	0.41	0.2115	0.28	14
1	0.58	0.46	0.12	0.9935	0.4625	0.2385	0.28	11
0	0.545	0.44	0.12	0.8565	0.3475	0.1715	0.24	12
1	0.605	0.495	0.17	1.2385	0.528	0.2465	0.39	14
1	0.62	0.47	0.14	1.0325	0.3605	0.224	0.36	15
1	0.63	0.5	0.17	1.3135	0.5595	0.267	0.4	20
0	0.63	0.515	0.165	1.352	0.488	0.349	0.45	20
1	0.63	0.5	0.155	1.005	0.367	0.199	0.36	16
0	0.545	0.41	0.14	0.625	0.223	0.16	0.235	13
1	0.67	0.54	0.165	1.5015	0.518	0.358	0.505	14
2	0.49	0.38	0.12	0.529	0.2165	0.139	0.155	11
1	0.49	0.39	0.135	0.5785	0.2465	0.123	0.2	13
2	0.29	0.225	0.07	0.101	0.036	0.0235	0.035	8
2	0.26	0.2	0.07	0.092	0.037	0.02	0.03	6
0	0.58	0.45	0.175	1.068	0.425	0.203	0.32	13
1	0.61	0.485	0.165	1.0915	0.3935	0.2435	0.33	18
0	0.6	0.5	0.16	1.015	0.3995	0.1735	0.33	19
1	0.56	0.455	0.125	0.943	0.344	0.129	0.375	21
1	0.575	0.45	0.17	1.0475	0.3775	0.1705	0.385	18
1	0.57	0.45	0.175	0.9555	0.38	0.1665	0.295	18
0	0.6	0.47	0.155	1.036	0.4375	0.196	0.325	20
0	0.565	0.455	0.17	0.9065	0.342	0.156	0.32	18
0	0.545	0.42	0.14	0.7505	0.2475	0.13	0.255	22
2	0.44	0.345	0.1	0.366	0.122	0.0905	0.12	13
0	0.5	0.41	0.15	0.662	0.2815	0.137	0.22	11
2	0.36	0.275	0.095	0.217	0.084	0.0435	0.09	7
2	0.385	0.305	0.095	0.252	0.0915	0.055	0.09	14
0	0.39	0.3	0.09	0.3055	0.143	0.0645	0.085	9
0	0.5	0.415	0.165	0.6885	0.249	0.138	0.25	13
2	0.36	0.275	0.11	0.2335	0.095	0.0525	0.085	10
2	0.335	0.26	0.1	0.192	0.0785	0.0585	0.07	8
1	0.505	0.425	0.14	0.85	0.275	0.1625	0.285	19
2	0.395	0.295	0.1	0.2715	0.134	0.0325	0.085	10
1	0.41	0.325	0.105	0.3635	0.159	0.077	0.12	10
1	0.56	0.455	0.19	0.714	0.283	0.129	0.275	9
0	0.565	0.435	0.185	0.9815	0.329	0.136	0.39	13
0	0.565	0.455	0.185	0.9265	0.354	0.1575	0.375	16
0	0.605	0.5	0.175	1.098	0.4765	0.232	0.375	12
1	0.565	0.455	0.15	0.8205	0.365	0.159	0.26	18
0	0.725	0.565	0.215	1.891	0.6975	0.4725	0.58	16
1	0.675	0.535	0.16	1.41	0.592	0.3175	0.42	16
1	0.665	0.555	0.195	1.4385	0.581	0.354	0.36	17
1	0.565	0.49	0.155	0.9245	0.405	0.2195	0.255	11
1	0.645	0.55	0.175	1.2915	0.57	0.3045	0.33	14
0	0.575	0.47	0.14	0.8375	0.3485	0.1735	0.24	11
1	0.64	0.54	0.175	1.221	0.51	0.259	0.39	15
2	0.36	0.28	0.105	0.199	0.0695	0.045	0.08	9
2	0.415	0.31	0.11	0.2965	0.123	0.057	0.0995	10
1	0.525	0.41	0.135	0.7085	0.293	0.1525	0.235	11
0	0.38	0.285	0.1	0.2665	0.115	0.061	0.075	11
1	0.585	0.465	0.17	0.9915	0.3865	0.224	0.265	12
2	0.24	0.185	0.07	0.0715	0.026	0.018	0.025	6
2	0.22	0.165	0.055	0.0545	0.0215	0.012	0.02	5
2	0.255	0.195	0.07	0.0735	0.0255	0.02	0.025	6
2	0.175	0.125	0.05	0.0235	0.008	0.0035	0.008	5
1	0.67	0.55	0.19	1.3905	0.5425	0.3035	0.4	12
0	0.655	0.53	0.195	1.388	0.567	0.2735	0.41	13
1	0.68	0.55	0.21	1.7445	0.5975	0.305	0.625	17
0	0.675	0.555	0.2	1.4385	0.545	0.2665	0.465	21
1	0.53	0.44	0.135	0.7835	0.313	0.1715	0.2185	9
1	0.515	0.405	0.12	0.646	0.2895	0.1405	0.177	10
2	0.43	0.34	0.12	0.3575	0.151	0.0645	0.1045	9
1	0.52	0.405	0.12	0.627	0.2645	0.1415	0.181	11
1	0.545	0.415	0.16	0.7715	0.272	0.1455	0.2765	10
0	0.53	0.415	0.175	0.7395	0.261	0.1395	0.2645	17
1	0.465	0.35	0.115	0.421	0.1565	0.091	0.1345	9
0	0.665	0.54	0.175	1.347	0.4955	0.254	0.415	17
0	0.735	0.59	0.225	1.756	0.637	0.3405	0.58	21
0	0.66	0.545	0.185	1.32	0.5305	0.2635	0.455	16
1	0.7	0.585	0.185	1.8075	0.7055	0.3215	0.475	29
0	0.575	0.4	0.155	0.9325	0.3605	0.2445	0.3	17
0	0.57	0.465	0.125	0.849	0.3785	0.1765	0.24	15
1	0.58	0.46	0.15	0.9955	0.429	0.212	0.26	19
0	0.63	0.48	0.145	1.0115	0.4235	0.237	0.305	12
1	0.585	0.465	0.14	0.908	0.381	0.1615	0.315	13
0	0.55	0.45	0.13	0.92	0.378	0.2385	0.29	11
1	0.625	0.515	0.15	1.2415	0.5235	0.3065	0.36	15
0	0.54	0.42	0.135	0.8075	0.3485	0.1795	0.235	11
1	0.57	0.455	0.165	1.0595	0.44	0.2195	0.285	14
0	0.59	0.455	0.145	1.073	0.475	0.19	0.285	14
0	0.58	0.46	0.13	0.921	0.357	0.181	0.29	13
1	0.655	0.51	0.155	1.2895	0.5345	0.2855	0.41	11
0	0.655	0.53	0.175	1.2635	0.486	0.2635	0.415	15
0	0.625	0.5	0.195	1.369	0.5875	0.2185	0.37	17
1	0.625	0.5	0.15	0.953	0.3445	0.2235	0.305	15
1	0.64	0.52	0.175	1.248	0.4245	0.2595	0.48	12
1	0.605	0.485	0.165	1.0105	0.435	0.209	0.3	19
1	0.615	0.525	0.155	1.0385	0.427	0.2315	0.345	11
0	0.555	0.45	0.175	0.874	0.3275	0.202	0.305	10
1	0.58	0.44	0.18	0.854	0.3665	0.1635	0.245	12
1	0.62	0.52	0.225	1.1835	0.378	0.27	0.395	23
1	0.62	0.47	0.225	1.115	0.378	0.2145	0.36	15
1	0.6	0.505	0.19	1.129	0.4385	0.256	0.36	13
1	0.625	0.485	0.19	1.1745	0.4385	0.2305	0.42	17
0	0.6	0.47	0.175	1.105	0.4865	0.247	0.315	15
0	0.56	0.46	0.235	0.8395	0.3325	0.157	0.305	12
0	0.585	0.455	0.225	1.055	0.3815	0.221	0.365	15
0	0.56	0.435	0.18	0.889	0.36	0.204	0.25	11
2	0.56	0.445	0.155	0.8735	0.3005	0.209	0.275	16
2	0.68	0.53	0.185	1.1095	0.439	0.245	0.34	10
1	0.455	0.35	0.14	0.5185	0.221	0.1265	0.135	10
1	0.49	0.38	0.145	0.6725	0.249	0.181	0.21	10
0	0.31	0.22	0.085	0.146	0.061	0.0365	0.045	6
1	0.275	0.195	0.07	0.08	0.031	0.0215	0.025	5
0	0.27	0.195	0.08	0.1	0.0385	0.0195	0.03	6
0	0.4	0.29	0.115	0.2795	0.1115	0.0575	0.075	9
0	0.28	0.2	0.08	0.0915	0.033	0.0215	0.03	5
0	0.325	0.23	0.09	0.147	0.06	0.034	0.045	4
1	0.345	0.25	0.09	0.203	0.078	0.059	0.055	6
0	0.21	0.15	0.05	0.0385	0.0155	0.0085	0.01	3
1	0.36	0.27	0.09	0.1885	0.0845	0.0385	0.055	5
2	0.365	0.26	0.115	0.218	0.0935	0.0445	0.07	9
0	0.2	0.14	0.055	0.035	0.0145	0.008	0.01	5
0	0.235	0.16	0.06	0.0545	0.0265	0.0095	0.015	4
0	0.175	0.125	0.04	0.024	0.0095	0.006	0.005	4
0	0.155	0.11	0.04	0.0155	0.0065	0.003	0.005	3
1	0.57	0.445	0.155	0.733	0.282	0.159	0.235	14
1	0.57	0.45	0.16	0.9715	0.3965	0.255	0.26	12
0	0.385	0.3	0.095	0.24	0.0885	0.059	0.085	9
2	0.53	0.42	0.185	0.752	0.299	0.156	0.205	20
1	0.46	0.355	0.13	0.458	0.192	0.1055	0.13	13
2	0.47	0.37	0.12	0.4705	0.1845	0.1055	0.155	12
1	0.435	0.335	0.11	0.38	0.1695	0.086	0.11	9
2	0.47	0.37	0.14	0.4985	0.2095	0.1225	0.145	10
2	0.465	0.38	0.13	0.454	0.1895	0.08	0.155	11
2	0.52	0.405	0.14	0.5775	0.2	0.145	0.179	11
0	0.29	0.23	0.075	0.1165	0.043	0.0255	0.04	7
0	0.275	0.205	0.07	0.094	0.0335	0.02	0.0325	5
1	0.375	0.29	0.115	0.2705	0.093	0.066	0.0885	10
1	0.5	0.375	0.14	0.604	0.242	0.1415	0.179	15
1	0.44	0.355	0.115	0.415	0.1585	0.0925	0.131	11
0	0.42	0.325	0.115	0.2885	0.1	0.057	0.1135	15
0	0.445	0.35	0.115	0.3615	0.1565	0.0695	0.117	8
1	0.38	0.29	0.105	0.257	0.099	0.051	0.085	10
0	0.32	0.245	0.075	0.1555	0.0585	0.038	0.049	11
0	0.255	0.195	0.065	0.08	0.0315	0.018	0.027	8
0	0.205	0.155	0.045	0.0425	0.017	0.0055	0.0155	7
1	0.565	0.45	0.16	0.795	0.3605	0.1555	0.23	12
2	0.555	0.425	0.18	0.875	0.3695	0.2005	0.255	11
2	0.65	0.515	0.16	1.1625	0.495	0.203	0.33	17
2	0.615	0.49	0.155	0.9885	0.4145	0.195	0.345	13
2	0.56	0.44	0.165	0.8	0.335	0.1735	0.25	12
2	0.48	0.37	0.12	0.514	0.2075	0.131	0.155	13
2	0.485	0.39	0.125	0.591	0.287	0.141	0.12	9
2	0.5	0.385	0.15	0.6265	0.2605	0.1665	0.16	10
2	0.525	0.405	0.15	0.795	0.3075	0.205	0.255	14
1	0.66	0.5	0.165	1.1905	0.4585	0.298	0.37	12
1	0.66	0.53	0.17	1.326	0.519	0.2625	0.44	13
2	0.52	0.4	0.145	0.66	0.267	0.1055	0.22	13
1	0.44	0.34	0.105	0.364	0.148	0.0805	0.1175	8
2	0.515	0.4	0.12	0.659	0.2705	0.179	0.17	13
1	0.475	0.35	0.115	0.452	0.1715	0.092	0.155	11
1	0.545	0.415	0.15	0.7335	0.2795	0.163	0.2185	11
1	0.47	0.355	0.13	0.5465	0.2005	0.126	0.185	14
0	0.35	0.255	0.065	0.179	0.0705	0.0385	0.06	10
2	0.485	0.355	0.13	0.581	0.245	0.132	0.168	12
2	0.435	0.33	0.125	0.406	0.1685	0.1055	0.096	12
0	0.28	0.21	0.08	0.1085	0.041	0.0265	0.0345	7
1	0.41	0.32	0.115	0.387	0.165	0.1005	0.0985	11
2	0.45	0.35	0.14	0.474	0.21	0.109	0.1275	16
2	0.45	0.345	0.135	0.443	0.1975	0.0875	0.1175	14
1	0.59	0.455	0.155	1.066	0.382	0.2275	0.415	20
1	0.57	0.44	0.14	0.9535	0.3785	0.201	0.305	17
2	0.61	0.475	0.15	0.9665	0.4145	0.2	0.345	10
1	0.61	0.475	0.14	1.133	0.5275	0.2355	0.35	11
2	0.56	0.425	0.14	0.9175	0.4005	0.1975	0.26	10
1	0.585	0.435	0.175	0.982	0.4055	0.2495	0.27	10
2	0.58	0.445	0.15	0.8865	0.383	0.209	0.255	11
1	0.63	0.48	0.175	1.3675	0.5015	0.3035	0.515	17
1	0.625	0.49	0.175	1.233	0.5565	0.247	0.365	11
2	0.55	0.425	0.15	0.806	0.376	0.171	0.245	14
1	0.645	0.525	0.19	1.4635	0.6615	0.3435	0.435	19
2	0.46	0.355	0.14	0.4935	0.216	0.133	0.115	13
1	0.41	0.305	0.1	0.363	0.1735	0.065	0.11	11
2	0.495	0.39	0.125	0.6655	0.284	0.162	0.2	11
2	0.52	0.425	0.17	0.6805	0.28	0.174	0.195	10
1	0.55	0.41	0.145	0.8285	0.3095	0.1905	0.25	13
0	0.45	0.335	0.14	0.4625	0.164	0.076	0.15	14
1	0.405	0.31	0.12	0.3095	0.138	0.058	0.095	13
2	0.51	0.4	0.15	0.745	0.2865	0.1675	0.235	13
1	0.37	0.29	0.115	0.25	0.111	0.057	0.075	9
2	0.525	0.41	0.175	0.874	0.3585	0.207	0.205	18
1	0.66	0.52	0.18	1.514	0.526	0.2975	0.42	19
0	0.535	0.42	0.15	0.6995	0.2575	0.153	0.24	12
2	0.575	0.455	0.18	0.8525	0.3015	0.1825	0.3	13
1	0.55	0.43	0.14	0.7135	0.2565	0.186	0.225	9
2	0.605	0.47	0.14	0.939	0.3385	0.201	0.32	13
2	0.605	0.495	0.145	1.054	0.369	0.2255	0.36	12
1	0.56	0.445	0.195	0.981	0.305	0.2245	0.335	16
2	0.535	0.42	0.145	0.926	0.398	0.1965	0.25	17
1	0.385	0.315	0.11	0.286	0.1225	0.0635	0.0835	10
1	0.39	0.3	0.1	0.265	0.1075	0.06	0.0865	13
2	0.47	0.345	0.115	0.4885	0.2005	0.108	0.166	11
2	0.515	0.39	0.14	0.5555	0.2	0.1135	0.2235	12
2	0.425	0.345	0.125	0.425	0.16	0.0795	0.154	13
0	0.345	0.27	0.09	0.195	0.078	0.0455	0.059	9
2	0.485	0.37	0.13	0.458	0.181	0.113	0.136	10
0	0.37	0.285	0.1	0.228	0.0675	0.0675	0.081	10
0	0.35	0.265	0.09	0.1775	0.0575	0.042	0.068	12
1	0.44	0.345	0.17	0.4085	0.15	0.0825	0.1515	12
0	0.195	0.145	0.05	0.032	0.01	0.008	0.012	4
0	0.325	0.24	0.075	0.155	0.0475	0.0355	0.06	9
2	0.495	0.37	0.125	0.4775	0.185	0.0705	0.169	18
2	0.45	0.35	0.145	0.525	0.2085	0.1	0.1655	15
0	0.415	0.345	0.135	0.3865	0.128	0.07	0.148	13
1	0.47	0.355	0.14	0.433	0.1525	0.095	0.152	12
0	0.32	0.24	0.085	0.17	0.0655	0.047	0.049	7
0	0.31	0.225	0.075	0.1295	0.0455	0.0335	0.044	9
0	0.235	0.17	0.055	0.0515	0.018	0.0105	0.0195	7
0	0.345	0.255	0.08	0.169	0.06	0.0425	0.054	10
2	0.485	0.38	0.14	0.673	0.2175	0.13	0.195	18
1	0.5	0.385	0.115	0.6785	0.2945	0.138	0.195	12
1	0.5	0.385	0.105	0.498	0.1795	0.1095	0.17	17
2	0.465	0.36	0.105	0.498	0.214	0.116	0.14	15
1	0.525	0.405	0.16	0.658	0.2655	0.1125	0.225	12
1	0.425	0.335	0.095	0.322	0.1205	0.061	0.125	10
1	0.38	0.305	0.095	0.2815	0.1255	0.0525	0.09	8
2	0.53	0.415	0.145	0.944	0.3845	0.185	0.265	21
0	0.34	0.265	0.085	0.1835	0.077	0.046	0.065	10
2	0.475	0.365	0.115	0.49	0.223	0.1235	0.1335	9
1	0.43	0.34	0.12	0.391	0.1555	0.095	0.1405	7
0	0.46	0.365	0.125	0.467	0.1895	0.0945	0.158	10
2	0.47	0.36	0.13	0.5225	0.198	0.1065	0.165	9
0	0.36	0.295	0.1	0.2105	0.066	0.0525	0.075	9
0	0.355	0.265	0.09	0.168	0.05	0.041	0.063	8
0	0.38	0.235	0.1	0.258	0.1055	0.054	0.08	7
0	0.355	0.26	0.085	0.1905	0.081	0.0485	0.055	6
2	0.44	0.345	0.12	0.487	0.1965	0.108	0.16	14
1	0.51	0.4	0.13	0.5735	0.219	0.1365	0.195	13
0	0.325	0.24	0.085	0.173	0.0795	0.038	0.05	7
2	0.62	0.485	0.18	1.1785	0.4675	0.2655	0.39	13
1	0.59	0.45	0.16	0.9	0.358	0.156	0.315	19
0	0.33	0.255	0.095	0.1875	0.0735	0.045	0.06	7
0	0.45	0.34	0.13	0.3715	0.1605	0.0795	0.105	9
2	0.445	0.33	0.12	0.347	0.12	0.084	0.105	11
0	0.33	0.215	0.075	0.1145	0.045	0.0265	0.035	6
0	0.48	0.375	0.145	0.777	0.216	0.13	0.17	9
2	0.46	0.35	0.12	0.4885	0.193	0.105	0.155	11
1	0.475	0.36	0.125	0.447	0.1695	0.081	0.14	9
0	0.255	0.18	0.065	0.079	0.034	0.014	0.025	5
2	0.335	0.245	0.09	0.1665	0.0595	0.04	0.06	6
2	0.47	0.35	0.13	0.466	0.1845	0.099	0.145	11
0	0.31	0.225	0.08	0.1345	0.054	0.024	0.05	7
1	0.37	0.28	0.11	0.2305	0.0945	0.0465	0.075	10
0	0.295	0.215	0.075	0.129	0.05	0.0295	0.04	7
1	0.555	0.435	0.165	0.97	0.336	0.2315	0.295	17
1	0.615	0.515	0.17	1.14	0.4305	0.2245	0.42	16
2	0.58	0.49	0.195	1.3165	0.5305	0.254	0.41	18
1	0.585	0.475	0.185	0.9585	0.4145	0.1615	0.33	11
2	0.65	0.525	0.18	1.626	0.597	0.3445	0.53	18
2	0.535	0.45	0.17	0.781	0.3055	0.1555	0.295	11
1	0.415	0.34	0.13	0.3675	0.146	0.0885	0.12	10
1	0.38	0.305	0.105	0.281	0.1045	0.0615	0.09	12
2	0.45	0.355	0.12	0.412	0.1145	0.0665	0.16	19
1	0.395	0.295	0.095	0.2245	0.078	0.054	0.08	10
0	0.455	0.35	0.12	0.4835	0.1815	0.144	0.16	11
1	0.485	0.38	0.15	0.605	0.2155	0.14	0.18	15
0	0.55	0.425	0.155	0.9175	0.2775	0.243	0.335	13
1	0.45	0.35	0.145	0.5425	0.1765	0.123	0.175	13
0	0.475	0.385	0.145	0.6175	0.235	0.108	0.215	14
1	0.5	0.38	0.155	0.655	0.2405	0.143	0.205	17
1	0.53	0.41	0.165	0.8115	0.24	0.169	0.24	19
0	0.49	0.39	0.15	0.573	0.225	0.124	0.17	21
1	0.49	0.385	0.15	0.7865	0.241	0.14	0.24	23
1	0.52	0.395	0.18	0.64	0.158	0.11	0.245	22
0	0.54	0.415	0.145	0.74	0.2635	0.168	0.245	12
1	0.5	0.375	0.115	0.5945	0.185	0.148	0.19	11
1	0.45	0.38	0.165	0.8165	0.25	0.1915	0.265	23
1	0.37	0.275	0.1	0.2225	0.093	0.026	0.08	8
2	0.37	0.275	0.1	0.2295	0.0885	0.0465	0.07	7
0	0.485	0.37	0.14	0.5725	0.204	0.1415	0.175	10
1	0.435	0.325	0.115	0.3915	0.154	0.094	0.12	7
0	0.535	0.405	0.185	0.8345	0.3175	0.1725	0.29	16
0	0.51	0.4	0.14	0.6515	0.2455	0.1665	0.185	10
0	0.565	0.44	0.185	0.909	0.344	0.2325	0.255	15
1	0.535	0.4	0.15	0.8045	0.3345	0.2125	0.21	13
1	0.535	0.405	0.125	0.927	0.26	0.1425	0.345	16
0	0.525	0.4	0.17	0.7305	0.279	0.2055	0.195	11
0	0.59	0.44	0.15	0.9555	0.366	0.2425	0.295	11
0	0.5	0.375	0.15	0.636	0.2535	0.145	0.19	10
2	0.255	0.19	0.075	0.0865	0.0345	0.0205	0.025	5
1	0.43	0.325	0.115	0.3865	0.1475	0.1065	0.11	11
0	0.38	0.29	0.12	0.283	0.1175	0.0655	0.085	9
2	0.165	0.11	0.02	0.019	0.0065	0.0025	0.005	4
2	0.315	0.23	0.09	0.1285	0.043	0.04	0.04	7
2	0.155	0.105	0.05	0.0175	0.005	0.0035	0.005	4
0	0.28	0.205	0.1	0.1165	0.0545	0.0285	0.03	5
1	0.43	0.335	0.12	0.444	0.155	0.1145	0.14	13
1	0.395	0.315	0.105	0.3515	0.1185	0.091	0.1195	16
0	0.385	0.285	0.105	0.2905	0.1215	0.0685	0.0875	12
1	0.48	0.385	0.135	0.536	0.1895	0.142	0.173	14
1	0.445	0.33	0.105	0.4525	0.18	0.103	0.123	9
0	0.395	0.295	0.115	0.316	0.1205	0.0595	0.1105	12
0	0.4	0.3	0.125	0.417	0.191	0.09	0.1175	9
0	0.415	0.325	0.14	0.417	0.1535	0.1015	0.144	10
0	0.315	0.25	0.09	0.203	0.0615	0.037	0.0795	11
1	0.345	0.26	0.09	0.207	0.0775	0.0435	0.0765	10
0	0.36	0.295	0.13	0.2765	0.0895	0.057	0.1005	10
2	0.295	0.225	0.09	0.1105	0.0405	0.0245	0.032	7
2	0.325	0.25	0.08	0.176	0.0595	0.0355	0.063	7
0	0.375	0.3	0.1	0.2465	0.104	0.0475	0.083	11
2	0.28	0.205	0.055	0.1135	0.045	0.0275	0.0335	7
0	0.355	0.265	0.085	0.201	0.069	0.053	0.0695	8
0	0.35	0.255	0.08	0.1915	0.08	0.0385	0.063	9
2	0.275	0.2	0.065	0.1035	0.0475	0.0205	0.03	7
2	0.29	0.205	0.07	0.0975	0.036	0.019	0.035	8
2	0.25	0.19	0.06	0.0765	0.036	0.0115	0.0245	6
2	0.18	0.125	0.035	0.0265	0.0095	0.0055	0.0085	4
2	0.15	0.1	0.025	0.015	0.0045	0.004	0.005	2
2	0.16	0.11	0.025	0.018	0.0065	0.0055	0.005	3
0	0.555	0.455	0.16	1.0575	0.3925	0.228	0.293	13
0	0.555	0.44	0.15	1.092	0.416	0.212	0.4405	15
0	0.525	0.41	0.13	0.99	0.3865	0.243	0.295	15
0	0.465	0.36	0.08	0.488	0.191	0.125	0.155	11
1	0.49	0.36	0.11	0.5005	0.161	0.107	0.195	17
0	0.4	0.305	0.085	0.297	0.108	0.0705	0.1	10
1	0.48	0.375	0.105	0.525	0.2185	0.1195	0.155	12
0	0.505	0.4	0.125	0.77	0.2735	0.159	0.255	13
1	0.52	0.4	0.12	0.6515	0.261	0.2015	0.165	15
0	0.525	0.4	0.13	0.8295	0.2405	0.1825	0.275	11
0	0.545	0.42	0.13	0.879	0.374	0.1695	0.23	13
0	0.52	0.4	0.12	0.823	0.298	0.1805	0.265	15
0	0.505	0.38	0.13	0.656	0.227	0.1785	0.22	13
0	0.525	0.425	0.12	0.8665	0.2825	0.176	0.29	18
0	0.51	0.39	0.125	0.6565	0.262	0.1835	0.175	10
0	0.52	0.385	0.115	0.669	0.2385	0.172	0.205	12
1	0.52	0.405	0.125	0.6435	0.2415	0.1735	0.21	12
0	0.535	0.41	0.135	0.862	0.2855	0.1525	0.32	14
0	0.445	0.345	0.09	0.3795	0.143	0.074	0.125	10
0	0.53	0.44	0.205	0.835	0.32	0.2175	0.245	14
1	0.36	0.265	0.09	0.2065	0.078	0.057	0.06	8
1	0.535	0.42	0.15	0.7365	0.2785	0.186	0.215	14
1	0.52	0.405	0.14	0.8175	0.2795	0.183	0.26	17
0	0.53	0.415	0.13	0.8425	0.275	0.1945	0.265	20
1	0.53	0.42	0.13	1.001	0.34	0.226	0.265	17
1	0.66	0.52	0.2	1.676	0.673	0.4805	0.45	17
0	0.52	0.385	0.14	0.6595	0.2485	0.2035	0.16	9
0	0.535	0.42	0.13	0.8055	0.301	0.181	0.28	14
0	0.695	0.515	0.175	1.5165	0.578	0.4105	0.39	15
1	0.51	0.39	0.105	0.612	0.187	0.15	0.195	13
0	0.485	0.355	0.12	0.547	0.215	0.1615	0.14	10
1	0.605	0.46	0.17	1.122	0.347	0.3045	0.315	13
1	0.58	0.455	0.165	1.1365	0.369	0.3005	0.275	13
0	0.65	0.515	0.175	1.4805	0.5295	0.272	0.525	20
0	0.62	0.505	0.185	1.5275	0.69	0.368	0.35	13
0	0.615	0.525	0.155	1.1375	0.367	0.236	0.37	20
1	0.605	0.495	0.19	1.437	0.469	0.2655	0.41	15
0	0.57	0.44	0.155	1.116	0.4775	0.2315	0.27	13
0	0.57	0.43	0.12	1.0615	0.348	0.167	0.31	15
0	0.585	0.405	0.15	1.2565	0.435	0.202	0.325	15
1	0.55	0.44	0.155	0.946	0.313	0.1825	0.335	16
1	0.54	0.44	0.135	0.959	0.2385	0.221	0.3	17
0	0.64	0.51	0.19	1.613	0.6215	0.361	0.47	14
1	0.61	0.47	0.145	1.153	0.403	0.296	0.32	14
0	0.545	0.45	0.15	0.978	0.3365	0.1905	0.3	11
1	0.59	0.445	0.13	1.1325	0.3825	0.234	0.32	13
0	0.345	0.27	0.095	0.197	0.0665	0.05	0.07	9
1	0.55	0.43	0.155	0.785	0.289	0.227	0.233	11
1	0.53	0.425	0.17	0.949	0.3485	0.2395	0.278	17
1	0.53	0.455	0.165	0.9805	0.3155	0.2815	0.2965	11
2	0.485	0.375	0.14	0.521	0.2	0.123	0.17	8
0	0.385	0.275	0.115	0.2685	0.0975	0.0825	0.085	8
0	0.455	0.34	0.135	0.462	0.1675	0.158	0.12	9
0	0.49	0.38	0.14	0.7605	0.245	0.167	0.185	10
0	0.53	0.41	0.165	0.732	0.189	0.17	0.31	11
0	0.505	0.385	0.145	0.6775	0.236	0.179	0.2	15
0	0.49	0.38	0.14	0.6385	0.2305	0.142	0.195	13
0	0.465	0.35	0.14	0.5755	0.2015	0.1505	0.19	15
1	0.47	0.36	0.145	0.537	0.1725	0.1375	0.195	15
0	0.56	0.41	0.165	0.93	0.3505	0.237	0.3	13
0	0.505	0.385	0.15	0.6415	0.246	0.152	0.215	12
0	0.515	0.435	0.145	0.8815	0.292	0.206	0.255	10
2	0.385	0.28	0.125	0.244	0.102	0.038	0.085	6
2	0.215	0.155	0.06	0.0525	0.021	0.0165	0.015	5
0	0.55	0.415	0.175	1.042	0.3295	0.2325	0.2905	15
1	0.515	0.39	0.13	0.5755	0.1975	0.13	0.1845	9
0	0.495	0.385	0.135	0.709	0.211	0.1375	0.262	12
1	0.505	0.39	0.16	0.644	0.2475	0.2025	0.1635	9
1	0.6	0.465	0.165	0.8875	0.309	0.246	0.262	12
1	0.57	0.465	0.16	0.8935	0.3145	0.2575	0.263	10
1	0.485	0.375	0.135	0.556	0.1925	0.1315	0.1685	10
0	0.47	0.37	0.18	0.51	0.1915	0.1285	0.1625	9
0	0.575	0.45	0.165	0.9215	0.3275	0.225	0.256	12
0	0.58	0.465	0.16	1.0345	0.315	0.26	0.3635	12
0	0.515	0.405	0.145	0.695	0.215	0.1635	0.234	15
0	0.53	0.41	0.155	0.7155	0.2805	0.1685	0.214	11
0	0.44	0.335	0.11	0.394	0.157	0.096	0.122	9
0	0.52	0.42	0.16	0.745	0.255	0.157	0.2885	11
1	0.425	0.345	0.11	0.3665	0.125	0.081	0.117	11
0	0.46	0.34	0.135	0.495	0.1655	0.117	0.185	10
0	0.45	0.335	0.125	0.349	0.119	0.1055	0.115	10
0	0.425	0.33	0.13	0.4405	0.152	0.0935	0.155	9
2	0.37	0.275	0.1	0.22	0.094	0.045	0.065	7
0	0.515	0.38	0.135	0.6615	0.2875	0.2095	0.155	10
0	0.405	0.305	0.12	0.3185	0.1235	0.0905	0.095	7
2	0.28	0.205	0.07	0.1015	0.041	0.03	0.03	6
1	0.48	0.4	0.125	0.759	0.2125	0.179	0.24	15
1	0.44	0.34	0.13	0.4195	0.153	0.1155	0.13	10
1	0.52	0.41	0.115	0.807	0.2855	0.179	0.235	12
0	0.505	0.405	0.14	0.875	0.2665	0.174	0.285	12
1	0.49	0.365	0.13	0.6835	0.165	0.1315	0.205	21
2	0.235	0.175	0.055	0.067	0.027	0.0125	0.018	6
2	0.255	0.185	0.06	0.088	0.0365	0.021	0.023	5
2	0.315	0.24	0.085	0.1715	0.071	0.0345	0.0535	7
2	0.325	0.25	0.08	0.1735	0.0765	0.0345	0.049	7
2	0.335	0.25	0.08	0.183	0.0735	0.04	0.0575	6
2	0.35	0.27	0.09	0.2055	0.075	0.0575	0.062	6
2	0.35	0.25	0.07	0.18	0.0655	0.048	0.054	6
2	0.36	0.3	0.085	0.27	0.1185	0.064	0.0745	7
2	0.365	0.275	0.135	0.24	0.108	0.0445	0.0735	7
2	0.37	0.275	0.14	0.2215	0.097	0.0455	0.0615	6
2	0.38	0.275	0.095	0.1375	0.086	0.0585	0.0605	7
2	0.385	0.29	0.095	0.312	0.143	0.0635	0.086	6
2	0.385	0.3	0.1	0.2895	0.1215	0.063	0.09	7
2	0.395	0.29	0.095	0.319	0.138	0.08	0.082	7
2	0.395	0.29	0.095	0.304	0.127	0.084	0.077	6
2	0.4	0.31	0.1	0.306	0.13	0.06	0.094	6
2	0.41	0.325	0.1	0.394	0.208	0.0655	0.106	6
2	0.415	0.32	0.11	0.3735	0.175	0.0755	0.109	7
0	0.415	0.305	0.1	0.325	0.156	0.0505	0.091	6
2	0.425	0.325	0.1	0.398	0.1185	0.0645	0.0945	6
2	0.44	0.365	0.115	0.501	0.2435	0.084	0.1465	9
2	0.445	0.335	0.1	0.4895	0.2745	0.086	0.1105	7
2	0.445	0.325	0.1	0.378	0.1795	0.1	0.089	7
2	0.45	0.35	0.13	0.547	0.245	0.1405	0.1405	8
0	0.47	0.375	0.12	0.5805	0.266	0.0935	0.169	8
2	0.475	0.365	0.125	0.5465	0.229	0.1185	0.172	9
1	0.48	0.365	0.135	0.6395	0.2945	0.113	0.175	8
2	0.485	0.355	0.105	0.498	0.2175	0.096	0.1525	9
0	0.49	0.385	0.125	0.609	0.3065	0.096	0.1775	8
1	0.495	0.41	0.125	0.7555	0.3355	0.129	0.214	9
0	0.5	0.4	0.125	0.5975	0.27	0.1275	0.166	9
0	0.505	0.44	0.14	0.8275	0.3415	0.1855	0.239	8
0	0.525	0.395	0.13	0.7635	0.3375	0.1425	0.225	8
0	0.54	0.405	0.125	0.891	0.4815	0.1915	0.202	9
1	0.54	0.42	0.14	0.805	0.369	0.1725	0.21	11
1	0.545	0.44	0.135	0.9185	0.429	0.2015	0.2375	10
1	0.55	0.43	0.125	0.923	0.4035	0.175	0.283	8
0	0.55	0.45	0.15	1.0145	0.407	0.2015	0.2875	10
1	0.55	0.45	0.15	0.875	0.362	0.1755	0.2765	10
0	0.555	0.435	0.145	0.9685	0.4985	0.168	0.2385	9
0	0.565	0.45	0.155	1.0595	0.4735	0.24	0.265	10
0	0.57	0.455	0.15	0.952	0.3895	0.2155	0.2745	9
0	0.57	0.435	0.13	0.7535	0.349	0.1755	0.194	10
1	0.575	0.465	0.14	0.958	0.442	0.1815	0.2705	9
0	0.59	0.475	0.165	1.077	0.4545	0.244	0.3095	9
0	0.59	0.46	0.13	1.102	0.455	0.2055	0.33	12
1	0.595	0.48	0.15	1.11	0.498	0.228	0.33	10
1	0.595	0.48	0.16	1.2095	0.5225	0.296	0.32	8
1	0.595	0.475	0.16	1.1405	0.547	0.231	0.271	6
1	0.595	0.465	0.14	1.113	0.5175	0.244	0.305	12
0	0.6	0.475	0.175	1.3445	0.549	0.2875	0.36	11
1	0.6	0.475	0.155	1.21	0.653	0.1695	0.3205	10
0	0.6	0.495	0.175	1.29	0.606	0.276	0.3445	11
1	0.605	0.475	0.175	1.382	0.609	0.2325	0.3985	10
0	0.605	0.455	0.16	1.1035	0.421	0.3015	0.325	9
1	0.615	0.5	0.175	1.377	0.5585	0.33	0.292	12
1	0.615	0.52	0.15	1.3435	0.629	0.2605	0.345	10
0	0.615	0.51	0.15	1.296	0.545	0.3315	0.32	9
0	0.615	0.505	0.165	1.34	0.5315	0.2815	0.41	12
1	0.62	0.505	0.16	1.3725	0.6285	0.275	0.3685	11
0	0.62	0.5	0.165	1.307	0.6355	0.2545	0.315	9
1	0.625	0.49	0.155	1.2085	0.465	0.162	0.411	11
1	0.625	0.49	0.2	1.3825	0.5895	0.285	0.381	11
0	0.63	0.505	0.165	1.26	0.4525	0.2755	0.406	14
0	0.635	0.51	0.17	1.3555	0.619	0.305	0.39	9
1	0.635	0.5	0.15	1.376	0.6495	0.361	0.31	10
1	0.635	0.485	0.165	1.2945	0.668	0.2605	0.2715	9
1	0.64	0.51	0.165	1.486	0.7595	0.332	0.321	8
0	0.65	0.525	0.175	1.4715	0.675	0.315	0.399	11
0	0.655	0.52	0.165	1.4095	0.586	0.291	0.405	9
0	0.655	0.58	0.205	2.0805	0.959	0.3415	0.601	17
0	0.66	0.53	0.17	1.3905	0.5905	0.212	0.453	15
0	0.66	0.52	0.19	1.558	0.755	0.298	0.4	10
1	0.67	0.585	0.16	1.309	0.5445	0.2945	0.413	10
1	0.675	0.525	0.17	1.8095	0.784	0.391	0.455	12
1	0.675	0.525	0.155	1.4785	0.628	0.3405	0.42	9
1	0.68	0.56	0.195	1.7775	0.861	0.322	0.415	11
1	0.685	0.54	0.16	1.6675	0.833	0.3775	0.475	11
1	0.695	0.56	0.22	1.834	0.8455	0.422	0.455	11
0	0.73	0.595	0.23	2.8255	1.1465	0.419	0.897	17
2	0.205	0.14	0.05	0.046	0.0165	0.012	0.0135	6
2	0.24	0.175	0.055	0.0705	0.025	0.014	0.021	5
2	0.24	0.175	0.065	0.0665	0.031	0.0135	0.017	3
2	0.255	0.19	0.05	0.083	0.0295	0.0215	0.027	6
2	0.255	0.18	0.055	0.083	0.031	0.0215	0.02	4
2	0.265	0.195	0.06	0.092	0.0345	0.025	0.0245	6
2	0.28	0.12	0.075	0.117	0.0455	0.029	0.0345	4
2	0.295	0.23	0.08	0.1625	0.065	0.05	0.0385	5
2	0.3	0.235	0.08	0.131	0.05	0.0265	0.043	4
2	0.3	0.23	0.095	0.1385	0.056	0.0365	0.037	6
2	0.305	0.22	0.07	0.141	0.062	0.031	0.037	5
2	0.315	0.235	0.075	0.1485	0.0585	0.0375	0.0425	6
2	0.315	0.23	0.07	0.144	0.053	0.0305	0.04	8
2	0.32	0.24	0.09	0.1575	0.07	0.0265	0.0425	5
2	0.325	0.24	0.075	0.187	0.0825	0.0445	0.05	6
2	0.33	0.265	0.085	0.196	0.0775	0.0305	0.0445	6
2	0.335	0.25	0.075	0.1825	0.0705	0.044	0.055	7
2	0.335	0.25	0.075	0.186	0.0945	0.038	0.0445	7
2	0.34	0.25	0.075	0.1785	0.0665	0.0455	0.045	5
2	0.34	0.25	0.07	0.2225	0.104	0.0425	0.055	7
2	0.345	0.265	0.1	0.2455	0.111	0.0535	0.065	7
2	0.37	0.29	0.095	0.249	0.1045	0.058	0.067	6
2	0.37	0.28	0.095	0.2865	0.1505	0.069	0.0795	7
2	0.375	0.28	0.09	0.215	0.084	0.06	0.055	6
2	0.385	0.265	0.08	0.251	0.124	0.037	0.07	6
2	0.41	0.31	0.09	0.339	0.155	0.0695	0.09	7
2	0.41	0.305	0.09	0.3535	0.157	0.0745	0.1	7
2	0.41	0.31	0.09	0.3335	0.1635	0.061	0.091	6
2	0.415	0.33	0.09	0.3595	0.17	0.081	0.09	6
2	0.42	0.32	0.115	0.376	0.169	0.092	0.1	5
2	0.42	0.315	0.1	0.3435	0.157	0.0795	0.09	6
2	0.425	0.34	0.1	0.382	0.164	0.096	0.1	6
2	0.425	0.315	0.1	0.377	0.1645	0.072	0.105	6
2	0.43	0.325	0.1	0.3645	0.1575	0.0825	0.105	7
2	0.43	0.325	0.09	0.425	0.217	0.087	0.095	7
2	0.435	0.325	0.12	0.3995	0.1815	0.061	0.1125	8
2	0.435	0.34	0.115	0.3925	0.1825	0.078	0.1145	6
2	0.44	0.345	0.13	0.4495	0.209	0.0835	0.134	6
2	0.44	0.325	0.09	0.35	0.148	0.067	0.105	7
1	0.445	0.335	0.11	0.4355	0.2025	0.1095	0.1195	6
2	0.445	0.35	0.13	0.4195	0.1695	0.0945	0.1195	7
2	0.45	0.36	0.13	0.478	0.191	0.127	0.137	7
2	0.45	0.355	0.105	0.4445	0.197	0.093	0.1335	8
2	0.45	0.345	0.11	0.47	0.2355	0.0855	0.1135	7
2	0.45	0.335	0.105	0.447	0.2335	0.153	0.119	7
2	0.455	0.355	0.125	0.5325	0.225	0.126	0.1465	7
2	0.455	0.375	0.12	0.497	0.2355	0.1055	0.1295	6
2	0.46	0.36	0.1	0.4635	0.2325	0.093	0.115	7
2	0.46	0.345	0.105	0.449	0.196	0.0945	0.1265	7
2	0.465	0.365	0.115	0.467	0.2315	0.0925	0.113	7
2	0.465	0.37	0.115	0.534	0.261	0.098	0.143	7
2	0.465	0.345	0.11	0.4415	0.1755	0.0905	0.12	7
1	0.465	0.35	0.125	0.482	0.23	0.106	0.1095	6
0	0.47	0.365	0.12	0.612	0.327	0.15	0.14	8
1	0.47	0.365	0.12	0.582	0.29	0.092	0.146	8
0	0.475	0.37	0.125	0.537	0.222	0.1215	0.15	9
1	0.475	0.36	0.12	0.5915	0.3245	0.11	0.127	6
0	0.48	0.375	0.115	0.6765	0.3205	0.1065	0.17	6
0	0.48	0.385	0.145	0.64	0.2925	0.1405	0.1575	6
0	0.48	0.36	0.1	0.439	0.194	0.099	0.115	8
0	0.48	0.365	0.12	0.6015	0.312	0.117	0.14	7
1	0.485	0.37	0.115	0.4785	0.1995	0.0955	0.129	7
0	0.49	0.385	0.125	0.649	0.32	0.124	0.1695	8
0	0.495	0.395	0.135	0.6335	0.3035	0.1295	0.1495	8
0	0.495	0.4	0.135	0.61	0.272	0.1435	0.144	7
0	0.5	0.39	0.135	0.6595	0.3145	0.1535	0.1565	6
2	0.5	0.385	0.12	0.56	0.2835	0.103	0.135	8
0	0.5	0.385	0.135	0.6425	0.3195	0.129	0.1535	7
0	0.5	0.4	0.125	0.6725	0.336	0.12	0.1825	7
1	0.505	0.39	0.13	0.674	0.3165	0.141	0.1785	9
2	0.505	0.39	0.15	0.685	0.362	0.131	0.156	8
0	0.505	0.41	0.125	0.642	0.289	0.133	0.155	9
2	0.505	0.355	0.125	0.601	0.25	0.1205	0.185	8
0	0.51	0.39	0.135	0.769	0.3935	0.1455	0.19	8
2	0.51	0.375	0.1	0.5785	0.238	0.1225	0.175	7
2	0.51	0.405	0.135	0.769	0.3655	0.1585	0.18	7
0	0.51	0.405	0.15	0.7035	0.347	0.134	0.1885	8
0	0.51	0.41	0.145	0.796	0.3865	0.1815	0.1955	8
1	0.515	0.43	0.14	0.834	0.367	0.2	0.23	8
0	0.515	0.39	0.155	0.7125	0.3695	0.137	0.155	7
1	0.525	0.415	0.14	0.724	0.3475	0.173	0.175	8
0	0.525	0.4	0.14	0.7325	0.334	0.1575	0.17	11
1	0.53	0.425	0.13	0.7585	0.325	0.197	0.205	8
1	0.53	0.425	0.15	0.8495	0.328	0.232	0.202	8
0	0.53	0.405	0.125	0.6515	0.2715	0.1605	0.186	7
1	0.535	0.4	0.135	0.8215	0.3935	0.196	0.205	8
0	0.535	0.43	0.14	0.7165	0.2855	0.1595	0.2155	8
0	0.535	0.435	0.14	0.874	0.3735	0.229	0.2195	8
1	0.55	0.445	0.155	0.9905	0.544	0.178	0.218	9
1	0.55	0.43	0.14	0.8105	0.368	0.161	0.275	9
1	0.56	0.455	0.16	0.967	0.4525	0.207	0.274	9
1	0.565	0.4	0.13	0.6975	0.3075	0.1665	0.18	8
0	0.57	0.45	0.155	1.195	0.5625	0.2565	0.295	10
0	0.57	0.45	0.155	1.1935	0.513	0.21	0.343	10
1	0.57	0.455	0.15	1.107	0.54	0.255	0.27	8
0	0.57	0.445	0.14	1.0635	0.5265	0.2195	0.24	8
0	0.57	0.46	0.17	0.9035	0.4075	0.1935	0.214	7
0	0.575	0.475	0.16	1.114	0.4955	0.2745	0.29	9
1	0.575	0.46	0.16	1.103	0.538	0.221	0.249	9
1	0.58	0.46	0.15	1.1155	0.5575	0.2255	0.29	7
1	0.58	0.46	0.18	1.0515	0.4095	0.2595	0.276	8
0	0.58	0.455	0.15	1.012	0.4985	0.2115	0.2835	10
1	0.58	0.45	0.145	1.137	0.5585	0.22	0.29	8
0	0.58	0.49	0.13	1.1335	0.586	0.2565	0.237	9
0	0.59	0.465	0.155	1.136	0.5245	0.2615	0.275	11
0	0.59	0.47	0.16	1.206	0.479	0.2425	0.309	8
1	0.59	0.455	0.145	1.063	0.5155	0.2445	0.25	8
1	0.595	0.47	0.155	1.121	0.4515	0.178	0.155	11
1	0.595	0.45	0.15	1.114	0.5865	0.2205	0.25	11
0	0.595	0.475	0.165	1.213	0.621	0.2435	0.274	9
1	0.595	0.46	0.14	1.0045	0.4655	0.2095	0.2515	9
0	0.595	0.455	0.15	1.044	0.518	0.2205	0.27	9
1	0.605	0.49	0.15	1.1345	0.5265	0.2645	0.295	9
0	0.605	0.475	0.155	1.161	0.572	0.2455	0.275	9
0	0.605	0.47	0.165	1.2315	0.6025	0.262	0.2925	11
0	0.61	0.47	0.15	1.1625	0.565	0.258	0.3085	11
0	0.61	0.475	0.155	1.168	0.554	0.239	0.3295	10
1	0.615	0.48	0.16	1.2525	0.585	0.2595	0.33	8
1	0.62	0.51	0.18	1.3315	0.594	0.276	0.388	11
1	0.625	0.48	0.17	1.3525	0.6235	0.278	0.365	10
0	0.625	0.49	0.175	1.3325	0.5705	0.271	0.405	10
1	0.625	0.475	0.175	1.1435	0.4755	0.2475	0.349	10
1	0.625	0.5	0.165	1.288	0.573	0.3035	0.315	9
1	0.625	0.485	0.2	1.38	0.5845	0.302	0.401	9
0	0.63	0.485	0.155	1.278	0.637	0.275	0.31	8
1	0.63	0.495	0.165	1.3075	0.599	0.284	0.315	11
0	0.63	0.48	0.15	1.1785	0.5185	0.248	0.3235	8
0	0.635	0.49	0.175	1.375	0.623	0.2705	0.395	11
0	0.635	0.525	0.185	1.4065	0.684	0.3	0.3745	10
0	0.64	0.505	0.155	1.4025	0.705	0.2655	0.335	10
1	0.64	0.5	0.17	1.5175	0.693	0.326	0.409	11
1	0.64	0.5	0.175	1.394	0.4935	0.291	0.4	10
1	0.645	0.5	0.155	1.2205	0.6145	0.236	0.3185	10
0	0.645	0.52	0.175	1.636	0.779	0.342	0.432	11
0	0.645	0.52	0.175	1.561	0.709	0.3555	0.4	8
1	0.645	0.505	0.165	1.4325	0.684	0.308	0.336	8
0	0.645	0.5	0.175	1.3385	0.633	0.299	0.349	11
1	0.645	0.5	0.16	1.2465	0.5475	0.327	0.3	10
1	0.645	0.515	0.15	1.212	0.515	0.2055	0.385	10
0	0.65	0.495	0.16	1.304	0.57	0.312	0.3725	9
0	0.65	0.52	0.21	1.6785	0.6665	0.308	0.46	11
0	0.65	0.525	0.185	1.622	0.6645	0.3225	0.477	10
1	0.655	0.46	0.16	1.494	0.6895	0.331	0.1825	9
1	0.655	0.51	0.175	1.6525	0.8515	0.3365	0.403	10
1	0.66	0.505	0.185	1.528	0.69	0.3025	0.441	11
0	0.66	0.535	0.19	1.5905	0.6425	0.297	0.5175	9
0	0.66	0.495	0.195	1.6275	0.594	0.3595	0.485	10
1	0.66	0.475	0.18	1.3695	0.641	0.294	0.335	6
0	0.67	0.525	0.165	1.6085	0.682	0.3145	0.4005	11
1	0.675	0.57	0.225	1.587	0.739	0.2995	0.435	10
1	0.675	0.565	0.195	1.8375	0.7645	0.3615	0.553	12
0	0.68	0.535	0.185	1.607	0.7245	0.3215	0.498	12
0	0.69	0.525	0.175	1.7005	0.8255	0.362	0.405	8
0	0.69	0.505	0.2	1.872	0.893	0.4015	0.48	10
1	0.695	0.535	0.175	1.8385	0.8035	0.396	0.503	10
1	0.705	0.535	0.18	1.685	0.693	0.42	0.4045	12
0	0.71	0.565	0.205	2.198	1.012	0.5225	0.5475	11
0	0.715	0.565	0.175	1.9525	0.7645	0.4185	0.4135	10
1	0.715	0.525	0.185	1.56	0.6655	0.383	0.405	11
1	0.735	0.6	0.22	2.555	1.1335	0.44	0.6	11
0	0.765	0.6	0.22	2.302	1.007	0.509	0.6205	12
2	0.185	0.13	0.045	0.029	0.012	0.0075	0.0095	4
2	0.195	0.15	0.045	0.0375	0.018	0.006	0.011	3
2	0.195	0.135	0.04	0.0325	0.0135	0.005	0.0095	4
2	0.2	0.155	0.04	0.0435	0.0155	0.009	0.007	4
2	0.225	0.165	0.055	0.059	0.027	0.0125	0.015	4
2	0.245	0.18	0.065	0.071	0.03	0.013	0.0215	4
2	0.25	0.18	0.065	0.0685	0.0245	0.0155	0.0225	5
2	0.265	0.195	0.055	0.084	0.0365	0.0175	0.025	7
2	0.275	0.195	0.065	0.106	0.054	0.02	0.028	6
2	0.28	0.21	0.085	0.1075	0.0415	0.024	0.034	5
2	0.285	0.22	0.065	0.096	0.0405	0.0205	0.03	5
2	0.3	0.22	0.08	0.1255	0.055	0.0265	0.039	6
2	0.315	0.235	0.055	0.151	0.065	0.027	0.039	6
2	0.32	0.225	0.085	0.1415	0.0675	0.0295	0.0405	6
2	0.34	0.265	0.08	0.2015	0.09	0.0475	0.055	5
2	0.37	0.28	0.1	0.221	0.1165	0.0265	0.0635	6
2	0.375	0.28	0.08	0.2345	0.1125	0.0455	0.067	6
2	0.375	0.275	0.1	0.2325	0.1165	0.042	0.065	6
2	0.385	0.29	0.08	0.2485	0.122	0.0495	0.065	7
2	0.4	0.32	0.095	0.348	0.194	0.053	0.087	6
2	0.405	0.3	0.11	0.32	0.172	0.044	0.093	7
2	0.41	0.3	0.1	0.282	0.1255	0.057	0.0875	7
2	0.41	0.325	0.1	0.3245	0.132	0.072	0.106	6
2	0.42	0.3	0.105	0.316	0.1255	0.07	0.1035	7
2	0.42	0.32	0.11	0.3625	0.174	0.0635	0.105	7
2	0.42	0.31	0.095	0.279	0.1255	0.051	0.088	6
2	0.425	0.325	0.115	0.3685	0.162	0.0865	0.1045	7
0	0.43	0.335	0.12	0.397	0.1985	0.0865	0.1035	7
2	0.435	0.33	0.11	0.413	0.2055	0.096	0.096	6
2	0.435	0.345	0.115	0.418	0.222	0.0735	0.106	7
2	0.44	0.33	0.11	0.3705	0.1545	0.084	0.12	7
2	0.445	0.345	0.105	0.409	0.1675	0.1015	0.117	7
2	0.445	0.34	0.145	0.434	0.1945	0.0905	0.13	7
2	0.445	0.335	0.11	0.411	0.1985	0.0935	0.109	8
2	0.45	0.365	0.125	0.462	0.2135	0.0985	0.1315	8
2	0.45	0.34	0.12	0.4925	0.241	0.1075	0.12	6
2	0.45	0.33	0.105	0.3715	0.1865	0.0785	0.0975	7
2	0.45	0.33	0.1	0.411	0.1945	0.1	0.098	6
2	0.45	0.33	0.11	0.3685	0.16	0.0885	0.102	6
2	0.46	0.35	0.115	0.4155	0.18	0.098	0.1175	7
0	0.47	0.36	0.105	0.544	0.27	0.1395	0.129	7
2	0.47	0.38	0.125	0.4845	0.211	0.1075	0.142	6
2	0.475	0.35	0.11	0.4565	0.206	0.099	0.13	6
2	0.475	0.35	0.1	0.4545	0.2165	0.111	0.115	7
2	0.48	0.38	0.125	0.6245	0.3395	0.1085	0.1665	8
0	0.49	0.465	0.125	0.5225	0.235	0.13	0.141	7
2	0.5	0.375	0.14	0.5495	0.248	0.112	0.1585	7
2	0.5	0.375	0.12	0.542	0.215	0.116	0.17	9
2	0.5	0.38	0.125	0.519	0.2485	0.1135	0.134	8
0	0.5	0.39	0.125	0.5215	0.2485	0.117	0.131	6
1	0.505	0.39	0.125	0.5445	0.246	0.15	0.1405	7
2	0.51	0.405	0.125	0.6795	0.3465	0.1395	0.182	8
1	0.51	0.4	0.125	0.545	0.261	0.115	0.1385	6
2	0.51	0.4	0.125	0.5575	0.2615	0.1195	0.1525	9
2	0.51	0.38	0.115	0.5155	0.215	0.1135	0.166	8
2	0.515	0.385	0.125	0.6115	0.3175	0.1265	0.15	8
0	0.52	0.4	0.145	0.7765	0.3525	0.1845	0.185	9
2	0.52	0.38	0.135	0.5395	0.2295	0.133	0.157	8
2	0.52	0.38	0.125	0.5545	0.288	0.1295	0.167	8
1	0.52	0.46	0.15	1.019	0.523	0.1985	0.254	7
2	0.525	0.4	0.13	0.6455	0.325	0.1245	0.17	8
2	0.525	0.4	0.14	0.601	0.2625	0.1285	0.1835	9
0	0.525	0.405	0.12	0.7555	0.3755	0.1555	0.201	9
2	0.525	0.395	0.12	0.608	0.297	0.1395	0.1405	8
2	0.53	0.4	0.125	0.617	0.279	0.127	0.19	8
2	0.535	0.39	0.125	0.599	0.2595	0.149	0.169	9
2	0.54	0.42	0.14	0.6665	0.3125	0.138	0.1895	10
0	0.545	0.39	0.135	0.7835	0.4225	0.1815	0.156	7
0	0.545	0.41	0.12	0.793	0.434	0.1405	0.19	9
0	0.545	0.415	0.14	0.82	0.4615	0.127	0.218	9
1	0.55	0.415	0.135	0.8145	0.427	0.1855	0.175	8
1	0.55	0.43	0.15	0.84	0.395	0.195	0.223	8
0	0.55	0.425	0.15	0.8315	0.411	0.1765	0.2165	10
0	0.56	0.43	0.145	0.8995	0.464	0.1775	0.234	9
0	0.56	0.445	0.16	0.8965	0.42	0.2175	0.2215	8
1	0.56	0.44	0.155	0.6405	0.336	0.1765	0.245	8
0	0.56	0.415	0.145	0.852	0.43	0.1885	0.205	8
0	0.565	0.455	0.15	0.9595	0.4565	0.2395	0.23	9
0	0.565	0.435	0.15	0.99	0.5795	0.1825	0.206	8
1	0.565	0.45	0.175	1.0095	0.447	0.2375	0.2645	9
0	0.57	0.46	0.15	1.0375	0.5415	0.2035	0.25	9
1	0.57	0.445	0.145	0.8775	0.412	0.217	0.22	8
2	0.57	0.44	0.15	0.755	0.3425	0.16	0.224	8
1	0.575	0.46	0.145	0.9945	0.466	0.229	0.265	7
1	0.575	0.45	0.16	1.068	0.556	0.214	0.2575	10
0	0.575	0.435	0.14	0.8455	0.401	0.191	0.222	9
1	0.575	0.47	0.165	0.869	0.435	0.197	0.238	9
0	0.575	0.455	0.135	0.907	0.4245	0.197	0.26	9
2	0.575	0.435	0.13	0.805	0.3155	0.2155	0.245	10
0	0.575	0.445	0.17	1.0225	0.549	0.2175	0.228	9
0	0.575	0.445	0.145	0.847	0.415	0.1945	0.22	9
0	0.58	0.455	0.15	1.114	0.4765	0.2155	0.265	8
0	0.58	0.455	0.195	1.859	0.945	0.426	0.441	9
0	0.58	0.445	0.135	0.814	0.3775	0.1915	0.22	9
0	0.58	0.45	0.14	0.9615	0.486	0.1815	0.253	9
0	0.58	0.45	0.145	1.0025	0.547	0.1975	0.2295	8
1	0.58	0.45	0.155	0.93	0.385	0.246	0.265	9
0	0.585	0.46	0.145	0.9335	0.478	0.1825	0.235	9
0	0.585	0.465	0.16	0.9555	0.4595	0.236	0.265	7
0	0.59	0.47	0.15	0.9955	0.481	0.232	0.24	8
1	0.6	0.475	0.16	1.0265	0.485	0.2495	0.2565	9
0	0.6	0.455	0.17	1.1915	0.696	0.2395	0.24	8
1	0.6	0.465	0.15	1.1025	0.5455	0.262	0.25	8
0	0.6	0.465	0.155	1.0165	0.512	0.2465	0.225	10
1	0.605	0.47	0.165	1.1775	0.611	0.2275	0.292	9
0	0.605	0.475	0.14	1.1175	0.555	0.257	0.274	9
0	0.605	0.48	0.17	1.1835	0.582	0.2365	0.317	10
1	0.605	0.475	0.165	1.056	0.433	0.2195	0.357	9
0	0.61	0.485	0.16	1.0145	0.5315	0.212	0.2415	8
0	0.61	0.485	0.145	1.3305	0.783	0.2255	0.2865	9
0	0.61	0.47	0.165	1.052	0.498	0.242	0.267	9
0	0.615	0.46	0.17	1.0565	0.4815	0.272	0.27	10
1	0.615	0.465	0.15	0.923	0.4615	0.1825	0.2415	9
1	0.615	0.475	0.155	1.027	0.447	0.25	0.285	9
0	0.62	0.47	0.135	1.0195	0.5315	0.2005	0.2475	8
0	0.62	0.45	0.2	0.858	0.4285	0.1525	0.2405	8
1	0.62	0.48	0.16	1.1125	0.5635	0.2445	0.281	8
1	0.625	0.485	0.175	1.3745	0.7335	0.2715	0.332	9
0	0.625	0.48	0.185	1.2065	0.587	0.29	0.286	8
0	0.63	0.47	0.155	1.1325	0.589	0.211	0.287	8
0	0.63	0.5	0.175	1.2645	0.5635	0.3065	0.3425	10
1	0.635	0.495	0.015	1.1565	0.5115	0.308	0.2885	9
0	0.64	0.515	0.165	1.369	0.632	0.3415	0.358	10
0	0.645	0.53	0.195	1.39	0.6465	0.2945	0.3735	10
1	0.645	0.48	0.17	1.1345	0.528	0.254	0.305	10
1	0.65	0.5	0.19	1.464	0.6415	0.339	0.4245	9
0	0.65	0.5	0.155	1.202	0.565	0.3135	0.294	11
0	0.655	0.515	0.16	1.31	0.553	0.369	0.345	11
1	0.655	0.51	0.175	1.415	0.5885	0.3725	0.364	10
1	0.66	0.53	0.185	1.346	0.546	0.2705	0.476	11
0	0.665	0.525	0.16	1.363	0.629	0.279	0.34	8
2	0.665	0.5	0.17	1.2975	0.6035	0.291	0.3595	9
1	0.67	0.505	0.205	1.3645	0.6075	0.3025	0.353	9
1	0.685	0.54	0.215	1.7025	0.664	0.3655	0.4735	14
0	0.685	0.52	0.165	1.519	0.699	0.3685	0.4	10
1	0.69	0.54	0.155	1.454	0.624	0.3105	0.39	9
0	0.69	0.53	0.21	1.583	0.7355	0.405	0.3865	12
1	0.69	0.53	0.17	1.5535	0.7945	0.3485	0.3695	9
0	0.695	0.56	0.185	1.74	0.885	0.3715	0.4375	10
0	0.7	0.565	0.18	1.751	0.895	0.3355	0.446	9
0	0.7	0.575	0.19	2.273	1.095	0.418	0.638	12
1	0.7	0.525	0.19	1.6465	0.8545	0.307	0.3995	9
1	0.705	0.55	0.17	1.219	0.6395	0.236	0.301	9
1	0.71	0.56	0.18	1.652	0.735	0.381	0.4525	11
0	0.715	0.55	0.19	2.0045	1.0465	0.407	0.5075	12
0	0.715	0.535	0.19	1.6755	0.889	0.313	0.42	10
1	0.72	0.58	0.195	2.103	1.0265	0.48	0.5375	10
1	0.72	0.55	0.2	1.9965	0.9035	0.469	0.5215	10
0	0.72	0.565	0.145	1.187	0.691	0.1945	0.2685	8
0	0.725	0.505	0.185	1.978	1.026	0.4255	0.4505	12
1	0.73	0.575	0.185	1.8795	0.931	0.38	0.4825	12
0	0.735	0.585	0.185	2.124	0.952	0.55	0.5	11
0	0.745	0.565	0.215	1.931	0.896	0.4585	0.5	11
1	0.75	0.57	0.21	2.236	1.109	0.5195	0.545	11
1	0.755	0.625	0.21	2.505	1.1965	0.513	0.6785	11
0	0.755	0.58	0.205	2.0065	0.8295	0.4015	0.595	10
1	0.78	0.63	0.215	2.657	1.488	0.4985	0.586	11
2	0.185	0.375	0.12	0.4645	0.196	0.1045	0.15	6
2	0.245	0.205	0.06	0.0765	0.034	0.014	0.0215	4
2	0.25	0.185	0.065	0.0685	0.0295	0.014	0.0225	5
2	0.25	0.19	0.065	0.0835	0.039	0.015	0.025	5
2	0.275	0.195	0.09	0.1125	0.0545	0.0295	0.0355	6
2	0.305	0.215	0.065	0.1075	0.044	0.0205	0.038	5
2	0.31	0.225	0.07	0.1055	0.435	0.015	0.04	5
2	0.315	0.23	0.08	0.1375	0.0545	0.031	0.0445	5
2	0.315	0.23	0.07	0.1145	0.046	0.0235	0.0385	5
2	0.325	0.225	0.075	0.139	0.0565	0.032	0.09	6
2	0.33	0.25	0.095	0.2085	0.102	0.0395	0.052	7
2	0.33	0.205	0.095	0.1595	0.077	0.032	0.0435	5
2	0.335	0.245	0.09	0.2015	0.096	0.0405	0.048	7
2	0.34	0.25	0.09	0.179	0.0775	0.033	0.055	6
2	0.345	0.255	0.095	0.1945	0.0925	0.037	0.055	6
2	0.345	0.255	0.085	0.2005	0.105	0.037	0.05	5
2	0.35	0.27	0.075	0.215	0.1	0.036	0.065	6
2	0.35	0.255	0.09	0.1785	0.0855	0.0305	0.0525	8
2	0.36	0.27	0.085	0.196	0.0875	0.035	0.064	4
2	0.365	0.27	0.085	0.1875	0.081	0.042	0.058	6
2	0.365	0.27	0.085	0.196	0.0825	0.0375	0.06	7
2	0.365	0.265	0.085	0.213	0.0945	0.049	0.06	7
2	0.37	0.29	0.09	0.2445	0.089	0.0655	0.075	7
2	0.37	0.28	0.085	0.217	0.1095	0.035	0.062	6
2	0.375	0.29	0.095	0.213	0.096	0.041	0.061	5
2	0.375	0.29	0.085	0.2385	0.118	0.045	0.0695	7
2	0.375	0.275	0.09	0.218	0.093	0.0405	0.0755	6
2	0.375	0.275	0.095	0.2465	0.11	0.0415	0.0775	6
2	0.375	0.28	0.08	0.2025	0.0825	0.048	0.065	8
2	0.375	0.27	0.085	0.218	0.0945	0.039	0.07	7
2	0.38	0.275	0.11	0.256	0.11	0.0535	0.0755	6
2	0.38	0.27	0.08	0.2105	0.0865	0.042	0.07	8
2	0.385	0.29	0.09	0.2615	0.111	0.0595	0.0745	9
2	0.385	0.28	0.085	0.2175	0.097	0.038	0.067	8
2	0.385	0.3	0.095	0.302	0.152	0.0615	0.0735	7
2	0.385	0.28	0.09	0.228	0.1025	0.042	0.0655	5
2	0.39	0.3	0.095	0.3265	0.1665	0.0575	0.089	7
2	0.395	0.305	0.105	0.284	0.1135	0.0595	0.0945	8
2	0.395	0.295	0.095	0.2725	0.115	0.0625	0.085	8
2	0.395	0.27	0.1	0.2985	0.1445	0.061	0.082	5
2	0.4	0.29	0.1	0.2675	0.1205	0.0605	0.0765	5
2	0.405	0.285	0.09	0.2645	0.1265	0.0505	0.075	6
2	0.41	0.335	0.11	0.33	0.157	0.0705	0.17	7
2	0.42	0.305	0.09	0.328	0.168	0.0615	0.082	6
2	0.425	0.325	0.11	0.3335	0.173	0.045	0.1	7
2	0.425	0.32	0.1	0.3055	0.126	0.06	0.106	7
2	0.425	0.31	0.09	0.301	0.1385	0.065	0.08	7
2	0.43	0.34	0	0.428	0.2065	0.086	0.115	8
2	0.43	0.315	0.095	0.378	0.175	0.08	0.1045	8
2	0.435	0.315	0.11	0.3685	0.1615	0.0715	0.12	7
2	0.44	0.34	0.12	0.438	0.2115	0.083	0.12	9
2	0.45	0.33	0.105	0.448	0.208	0.089	0.12	9
2	0.455	0.345	0.105	0.4005	0.164	0.0755	0.126	8
1	0.455	0.365	0.115	0.4305	0.184	0.108	0.1245	8
2	0.455	0.33	0.1	0.372	0.358	0.0775	0.11	8
2	0.46	0.36	0.105	0.466	0.2225	0.099	0.11	7
2	0.46	0.35	0.105	0.3705	0.1575	0.077	0.114	9
1	0.46	0.365	0.125	0.4785	0.206	0.1045	0.141	8
2	0.465	0.34	0.11	0.346	0.1425	0.073	0.113	11
2	0.47	0.365	0.1	0.411	0.175	0.0855	0.135	8
2	0.47	0.355	0.18	0.48	0.2055	0.105	0.1505	8
2	0.47	0.355	0.12	0.393	0.167	0.0885	0.115	8
2	0.475	0.355	0.1	0.5035	0.2535	0.091	0.14	8
2	0.475	0.38	0.12	0.441	0.1785	0.0885	0.1505	8
2	0.475	0.36	0.11	0.492	0.211	0.11	0.15	8
2	0.48	0.37	0.125	0.5435	0.244	0.101	0.165	9
2	0.48	0.355	0.115	0.4725	0.2065	0.112	0.132	8
2	0.48	0.365	0.1	0.461	0.2205	0.0835	0.135	8
2	0.495	0.355	0.12	0.4965	0.214	0.1045	0.1495	8
2	0.495	0.38	0.13	0.5125	0.2185	0.116	0.16	7
0	0.495	0.395	0.12	0.553	0.224	0.1375	0.167	8
2	0.5	0.38	0.135	0.594	0.2945	0.104	0.1565	9
0	0.5	0.42	0.135	0.6765	0.302	0.1415	0.2065	9
2	0.5	0.375	0.145	0.5795	0.239	0.1375	0.185	9
2	0.5	0.41	0.14	0.6615	0.2585	0.1625	0.196	9
2	0.5	0.375	0.125	0.5695	0.259	0.124	0.157	7
2	0.5	0.395	0.14	0.6215	0.2925	0.1205	0.195	9
2	0.505	0.405	0.13	0.6015	0.3015	0.11	0.18	8
2	0.505	0.38	0.12	0.594	0.2595	0.1435	0.18	7
2	0.505	0.395	0.105	0.551	0.248	0.103	0.171	8
2	0.515	0.38	0.12	0.625	0.3265	0.1295	0.16	7
2	0.515	0.42	0.135	0.711	0.337	0.144	0.205	13
2	0.515	0.4	0.135	0.6965	0.32	0.1255	0.175	9
2	0.52	0.4	0.13	0.5825	0.233	0.1365	0.18	10
2	0.52	0.395	0.125	0.663	0.3005	0.131	0.1905	9
2	0.525	0.4	0.125	0.6965	0.369	0.1385	0.164	9
0	0.525	0.42	0.155	0.842	0.428	0.1415	0.2045	9
2	0.53	0.415	0.13	0.694	0.3905	0.111	0.167	9
2	0.53	0.42	0.155	0.81	0.4725	0.111	0.192	10
2	0.53	0.415	0.11	0.5745	0.2525	0.1235	0.189	9
2	0.53	0.425	0.13	0.7675	0.419	0.1205	0.21	9
2	0.535	0.4	0.135	0.6025	0.2895	0.121	0.154	9
2	0.535	0.415	0.15	0.5765	0.3595	0.135	0.225	8
1	0.535	0.41	0.13	0.7145	0.335	0.144	0.2075	9
0	0.535	0.435	0.15	0.717	0.3475	0.1445	0.194	9
1	0.54	0.42	0.145	0.8655	0.4315	0.163	0.2175	10
2	0.54	0.42	0.14	0.7265	0.3205	0.1445	0.229	9
2	0.545	0.435	0.135	0.7715	0.372	0.148	0.227	8
1	0.545	0.445	0.15	0.8	0.3535	0.163	0.207	9
2	0.545	0.43	0.15	0.7285	0.302	0.1315	0.2545	10
2	0.545	0.405	0.135	0.5945	0.27	0.1185	0.185	8
2	0.55	0.43	0.145	0.7895	0.3745	0.171	0.223	11
1	0.55	0.405	0.125	0.651	0.2965	0.137	0.2	9
0	0.55	0.43	0.15	0.8745	0.413	0.1905	0.248	9
2	0.55	0.435	0.14	0.7535	0.3285	0.1555	0.2325	10
2	0.55	0.425	0.135	0.7305	0.3325	0.1545	0.215	9
0	0.555	0.44	0.14	0.8705	0.407	0.156	0.255	9
2	0.555	0.43	0.155	0.7395	0.3135	0.1435	0.28	10
2	0.555	0.43	0.14	0.7665	0.341	0.165	0.23	9
2	0.555	0.425	0.145	0.7905	0.3485	0.1765	0.225	9
2	0.56	0.425	0.135	0.8205	0.3715	0.185	0.236	9
2	0.56	0.425	0.145	0.688	0.3095	0.1305	0.2165	9
1	0.56	0.445	0.155	1.224	0.5565	0.3225	0.2695	10
2	0.56	0.455	0.145	0.974	0.547	0.1615	0.235	9
2	0.565	0.44	0.175	0.8735	0.414	0.21	0.21	11
1	0.565	0.45	0.145	0.8495	0.4215	0.1685	0.225	8
0	0.565	0.445	0.15	0.796	0.3635	0.184	0.219	8
0	0.565	0.39	0.125	0.744	0.352	0.13	0.1685	11
2	0.57	0.45	0.145	0.751	0.2825	0.2195	0.2215	10
2	0.57	0.45	0.135	0.794	0.3815	0.1415	0.245	8
1	0.57	0.46	0.135	0.9795	0.397	0.2525	0.2655	9
0	0.57	0.435	0.17	0.873	0.382	0.183	0.2705	10
2	0.57	0.44	0.13	0.7665	0.347	0.1785	0.202	10
0	0.57	0.435	0.125	0.8965	0.383	0.1835	0.275	9
1	0.575	0.42	0.135	0.857	0.461	0.147	0.2125	10
1	0.575	0.48	0.165	1.078	0.511	0.2095	0.306	9
0	0.575	0.46	0.155	0.892	0.4415	0.176	0.22	10
0	0.58	0.46	0.155	1.4395	0.6715	0.273	0.2955	10
0	0.58	0.455	0.135	0.7955	0.405	0.167	0.204	10
1	0.58	0.445	0.15	0.858	0.4	0.156	0.253	8
0	0.585	0.465	0.155	0.9145	0.4555	0.1965	0.235	9
0	0.585	0.49	0.185	1.171	0.522	0.2535	0.335	10
2	0.585	0.475	0.16	1.0505	0.48	0.234	0.285	10
0	0.585	0.46	0.165	1.1135	0.5825	0.2345	0.274	10
0	0.585	0.47	0.165	1.409	0.8	0.229	0.295	10
0	0.585	0.475	0.15	1.065	0.5315	0.199	0.2885	10
0	0.585	0.45	0.18	0.7995	0.336	0.1855	0.237	8
2	0.59	0.445	0.135	0.7715	0.328	0.1745	0.23	9
0	0.59	0.47	0.18	1.187	0.5985	0.227	0.31	9
0	0.59	0.455	0.155	0.8855	0.388	0.188	0.275	10
1	0.595	0.465	0.15	0.98	0.4115	0.196	0.2255	10
1	0.595	0.465	0.155	1.026	0.4645	0.112	0.305	12
0	0.6	0.475	0.17	1.1315	0.508	0.272	0.309	10
0	0.6	0.48	0.155	1.014	0.451	0.1885	0.325	11
2	0.6	0.475	0.15	1.12	0.565	0.2465	0.27	10
1	0.6	0.465	0.155	1.04	0.4755	0.25	0.28	11
1	0.6	0.455	0.145	0.8895	0.419	0.1715	0.269	10
0	0.6	0.46	0.155	0.9595	0.4455	0.189	0.295	11
2	0.605	0.485	0.15	1.238	0.6315	0.226	0.33	11
0	0.605	0.49	0.14	0.9755	0.419	0.206	0.315	10
2	0.605	0.435	0.13	0.9025	0.432	0.174	0.26	11
1	0.605	0.475	0.175	1.076	0.463	0.2195	0.335	9
1	0.605	0.47	0.16	1.0835	0.5405	0.2215	0.275	12
0	0.61	0.45	0.15	0.871	0.407	0.1835	0.25	10
0	0.61	0.48	0.165	1.244	0.6345	0.257	0.305	12
0	0.61	0.475	0.17	1.0265	0.435	0.2335	0.3035	10
2	0.61	0.465	0.15	0.9605	0.4495	0.1725	0.286	9
0	0.61	0.48	0.17	1.137	0.4565	0.29	0.347	10
0	0.61	0.46	0.16	1	0.494	0.197	0.275	10
1	0.615	0.475	0.155	1.004	0.4475	0.193	0.2895	10
0	0.615	0.47	0.165	1.128	0.4465	0.2195	0.34	10
0	0.615	0.5	0.17	1.054	0.4845	0.228	0.295	10
1	0.615	0.475	0.165	1.023	0.4905	0.1955	0.3035	12
0	0.615	0.475	0.17	1.129	0.4795	0.302	0.3	10
0	0.615	0.48	0.175	1.118	0.446	0.3195	0.3	9
1	0.615	0.475	0.155	1.115	0.484	0.2115	0.355	10
0	0.62	0.51	0.175	1.2815	0.5715	0.2385	0.39	10
0	0.62	0.495	0.18	1.2555	0.5765	0.254	0.355	12
1	0.62	0.5	0.15	1.293	0.596	0.3135	0.354	10
1	0.62	0.475	0.16	1.1295	0.463	0.2685	0.33	10
0	0.625	0.455	0.17	1.082	0.4955	0.2345	0.315	9
1	0.625	0.505	0.175	1.15	0.5475	0.256	0.3045	11
1	0.625	0.515	0.16	1.264	0.5715	0.326	0.321	9
1	0.625	0.48	0.155	1.2035	0.5865	0.239	0.3185	12
1	0.63	0.485	0.17	1.3205	0.5945	0.345	0.345	9
2	0.63	0.505	0.18	1.272	0.6025	0.295	0.315	11
0	0.63	0.485	0.145	1.062	0.5065	0.1785	0.3365	12
2	0.63	0.475	0.145	1.0605	0.5165	0.2195	0.28	10
0	0.63	0.495	0.16	1.093	0.497	0.221	0.315	12
0	0.635	0.49	0.16	1.101	0.534	0.1865	0.3455	10
1	0.635	0.5	0.165	1.4595	0.705	0.2645	0.39	9
1	0.635	0.495	0.175	1.211	0.707	0.2725	0.323	9
0	0.635	0.475	0.17	1.1935	0.5205	0.2695	0.3665	10
0	0.635	0.51	0.155	0.986	0.405	0.2255	0.31	10
0	0.64	0.565	0.23	1.521	0.644	0.372	0.406	15
0	0.64	0.525	0.18	1.3135	0.4865	0.2995	0.4075	10
0	0.645	0.51	0.16	1.1835	0.556	0.2385	0.345	11
0	0.645	0.5	0.195	1.401	0.6165	0.3515	0.3725	10
0	0.645	0.525	0.16	1.5075	0.7455	0.245	0.4325	11
1	0.65	0.505	0.165	1.16	0.4785	0.274	0.349	11
1	0.65	0.59	0.22	1.662	0.77	0.378	0.435	11
0	0.65	0.525	0.175	1.5365	0.6865	0.3585	0.405	11
0	0.65	0.51	0.19	1.542	0.7155	0.3735	0.375	9
1	0.65	0.51	0.17	1.567	0.7245	0.349	0.391	10
1	0.655	0.525	0.19	1.3595	0.564	0.3215	0.3985	10
0	0.655	0.535	0.205	1.6445	0.7305	0.3595	0.46	13
1	0.655	0.52	0.19	1.4545	0.6	0.3865	0.383	10
0	0.655	0.49	0.175	1.3585	0.6395	0.294	0.365	10
1	0.66	0.495	0.21	1.548	0.724	0.3525	0.3925	10
1	0.66	0.515	0.17	1.337	0.615	0.3125	0.3575	10
1	0.665	0.53	0.18	1.491	0.6345	0.342	0.435	10
1	0.67	0.53	0.225	1.5615	0.63	0.487	0.3725	11
1	0.67	0.505	0.175	1.0145	0.4375	0.271	0.3745	10
0	0.675	0.545	0.185	1.7375	0.876	0.3135	0.469	13
0	0.685	0.545	0.205	1.7925	0.8145	0.416	0.461	9
1	0.695	0.565	0.19	1.7635	0.7465	0.399	0.4975	11
1	0.7	0.545	0.13	1.556	0.6725	0.374	0.195	12
0	0.705	0.565	0.515	2.21	1.1075	0.4865	0.512	10
0	0.705	0.555	0.215	2.141	1.0465	0.383	0.528	11
1	0.705	0.57	0.18	1.5345	0.96	0.4195	0.43	12
1	0.71	0.55	0.17	1.614	0.743	0.345	0.45	11
1	0.72	0.575	0.17	1.9335	0.913	0.389	0.51	13
0	0.72	0.575	0.215	2.173	0.9515	0.564	0.5365	12
1	0.725	0.6	0.2	1.737	0.697	0.3585	0.595	11
1	0.73	0.58	0.19	1.7375	0.6785	0.4345	0.52	11
1	0.735	0.565	0.205	2.1275	0.949	0.46	0.565	12
1	0.745	0.57	0.215	2.25	1.1565	0.446	0.558	9
1	0.75	0.61	0.235	2.5085	1.232	0.519	0.612	14
1	0.815	0.65	0.25	2.255	0.8905	0.42	0.7975	14
2	0.14	0.105	0.035	0.014	0.0055	0.0025	0.004	3
2	0.23	0.165	0.06	0.0515	0.019	0.0145	0.036	4
2	0.365	0.265	0.135	0.2215	0.105	0.047	0.0605	7
2	0.365	0.255	0.08	0.1985	0.0785	0.0345	0.053	5
2	0.37	0.27	0.095	0.232	0.1325	0.041	0.0615	6
2	0.375	0.28	0.085	0.3155	0.187	0.046	0.067	7
2	0.385	0.3	0.09	0.247	0.1225	0.044	0.0675	5
2	0.395	0.295	0.09	0.3025	0.143	0.0665	0.0765	5
2	0.4	0.29	0.11	0.329	0.188	0.0455	0.0825	6
2	0.4	0.3	0.09	0.2815	0.1185	0.061	0.08	7
2	0.405	0.31	0.095	0.3425	0.1785	0.064	0.0855	8
2	0.405	0.29	0.09	0.2825	0.112	0.075	0.0815	7
2	0.405	0.3	0.105	0.304	0.1455	0.061	0.0805	6
2	0.41	0.32	0.095	0.2905	0.141	0.063	0.073	5
0	0.415	0.315	0.115	0.3895	0.2015	0.065	0.103	9
2	0.425	0.34	0.105	0.389	0.2015	0.0905	0.088	6
2	0.43	0.34	0.105	0.4405	0.2385	0.0745	0.1075	6
2	0.44	0.34	0.105	0.369	0.164	0.08	0.1015	5
0	0.44	0.32	0.12	0.4565	0.2435	0.092	0.1025	8
2	0.44	0.365	0.11	0.4465	0.213	0.089	0.1135	9
0	0.45	0.335	0.125	0.4475	0.2165	0.126	0.11	6
2	0.455	0.335	0.135	0.501	0.274	0.0995	0.1065	7
2	0.46	0.355	0.11	0.436	0.1975	0.096	0.125	8
2	0.47	0.345	0.14	0.4615	0.229	0.1105	0.116	9
2	0.47	0.35	0.125	0.4315	0.19	0.1165	0.1175	6
2	0.47	0.355	0.12	0.3685	0.126	0.0835	0.1365	6
0	0.475	0.37	0.125	0.649	0.347	0.136	0.142	8
2	0.475	0.365	0.115	0.459	0.2175	0.093	0.1165	7
1	0.475	0.365	0.115	0.566	0.281	0.117	0.1335	7
2	0.48	0.36	0.125	0.542	0.2795	0.1025	0.147	7
2	0.485	0.38	0.12	0.4725	0.2075	0.1075	0.147	6
0	0.485	0.39	0.085	0.6435	0.2945	0.103	0.198	8
0	0.485	0.37	0.13	0.526	0.2485	0.105	0.1555	6
1	0.495	0.38	0.12	0.573	0.2655	0.1285	0.144	7
0	0.505	0.385	0.105	0.5525	0.239	0.1245	0.1555	9
1	0.505	0.38	0.135	0.6855	0.361	0.1565	0.161	9
2	0.515	0.395	0.125	0.556	0.2695	0.096	0.17	8
0	0.515	0.425	0.145	0.9365	0.497	0.181	0.2185	8
2	0.515	0.4	0.125	0.5625	0.25	0.1245	0.17	7
0	0.52	0.4	0.125	0.559	0.254	0.139	0.149	8
0	0.525	0.4	0.14	0.7205	0.3685	0.145	0.1735	8
2	0.53	0.43	0.13	0.7045	0.346	0.1415	0.189	9
0	0.53	0.4	0.125	0.7575	0.398	0.151	0.175	8
1	0.545	0.41	0.14	0.7405	0.3565	0.1775	0.203	9
1	0.55	0.43	0.14	0.84	0.375	0.218	0.1945	8
0	0.55	0.425	0.16	0.793	0.343	0.2035	0.215	9
1	0.56	0.43	0.15	0.8745	0.453	0.161	0.22	8
1	0.56	0.435	0.15	0.8715	0.4755	0.1835	0.1835	9
0	0.57	0.445	0.15	0.9875	0.504	0.207	0.249	8
0	0.575	0.465	0.15	1.08	0.595	0.2065	0.238	9
0	0.575	0.46	0.165	0.9155	0.4005	0.2465	0.2385	8
1	0.58	0.46	0.175	1.165	0.65	0.2205	0.3055	9
1	0.58	0.435	0.14	0.953	0.475	0.2165	0.2095	9
0	0.585	0.455	0.15	0.906	0.4095	0.23	0.2335	8
0	0.59	0.44	0.15	0.8725	0.387	0.215	0.245	8
1	0.59	0.465	0.15	1.151	0.613	0.239	0.2515	9
1	0.59	0.46	0.145	0.9905	0.453	0.2205	0.275	8
1	0.595	0.455	0.16	1.04	0.452	0.2655	0.288	9
0	0.6	0.455	0.155	0.945	0.4365	0.2085	0.25	8
0	0.6	0.465	0.2	1.259	0.6405	0.1985	0.357	9
1	0.605	0.485	0.165	0.9515	0.4535	0.193	0.2765	11
1	0.605	0.485	0.16	1.201	0.417	0.2875	0.38	9
1	0.605	0.515	0.17	1.289	0.6	0.2945	0.3315	9
1	0.61	0.485	0.17	1.1005	0.5125	0.229	0.305	11
2	0.615	0.475	0.13	0.8425	0.353	0.1915	0.251	8
0	0.62	0.485	0.155	1.049	0.462	0.231	0.25	10
1	0.62	0.435	0.155	1.012	0.477	0.236	0.275	8
0	0.62	0.48	0.165	1.0725	0.4815	0.235	0.312	9
0	0.625	0.52	0.175	1.4105	0.691	0.322	0.3465	10
0	0.625	0.47	0.18	1.136	0.451	0.3245	0.305	11
0	0.63	0.47	0.145	1.1005	0.52	0.26	0.276	9
1	0.63	0.5	0.175	1.1105	0.467	0.268	0.329	10
0	0.63	0.455	0.15	1.1315	0.481	0.2745	0.305	9
0	0.63	0.48	0.15	1.271	0.6605	0.2425	0.31	11
1	0.63	0.49	0.225	1.336	0.6805	0.259	0.3245	10
1	0.635	0.505	0.145	1.1345	0.505	0.2655	0.315	10
0	0.635	0.51	0.185	1.308	0.544	0.318	0.377	8
1	0.64	0.515	0.205	1.5335	0.6635	0.3345	0.4025	9
1	0.645	0.515	0.175	1.546	0.7035	0.365	0.415	10
0	0.645	0.51	0.155	1.539	0.6405	0.3585	0.43	11
1	0.645	0.505	0.165	1.318	0.55	0.3015	0.335	11
1	0.65	0.545	0.175	1.5245	0.59	0.326	0.495	10
0	0.65	0.515	0.175	1.466	0.677	0.3045	0.4	10
1	0.65	0.5	0.16	1.3825	0.702	0.304	0.3195	9
0	0.65	0.485	0.14	1.175	0.475	0.2435	0.215	8
1	0.655	0.54	0.215	1.5555	0.695	0.296	0.444	11
0	0.655	0.51	0.215	1.7835	0.8885	0.4095	0.4195	11
0	0.66	0.505	0.165	1.374	0.589	0.351	0.345	10
1	0.665	0.515	0.18	1.389	0.5945	0.324	0.395	10
0	0.67	0.545	0.2	1.7025	0.833	0.374	0.41	11
0	0.67	0.51	0.175	1.5265	0.651	0.4475	0.345	10
0	0.67	0.5	0.19	1.519	0.616	0.388	0.415	10
1	0.68	0.5	0.185	1.741	0.7665	0.3255	0.4685	12
0	0.68	0.515	0.17	1.6115	0.8415	0.306	0.395	11
0	0.69	0.525	0.2	1.7825	0.9165	0.3325	0.461	12
1	0.7	0.55	0.17	1.684	0.7535	0.3265	0.32	11
0	0.7	0.555	0.2	1.858	0.73	0.3665	0.595	11
0	0.705	0.56	0.165	1.675	0.797	0.4095	0.388	10
0	0.72	0.565	0.2	2.1055	1.017	0.363	0.494	12
0	0.725	0.575	0.24	2.21	1.351	0.413	0.5015	13
0	0.74	0.57	0.18	1.8725	0.9115	0.427	0.446	10
0	0.75	0.55	0.18	1.893	0.942	0.397	0.445	11
2	0.21	0.17	0.045	0.0475	0.019	0.011	0.013	5
2	0.285	0.21	0.055	0.101	0.0415	0.017	0.0335	5
2	0.295	0.215	0.07	0.121	0.047	0.0155	0.0405	6
2	0.3	0.23	0.085	0.117	0.05	0.0175	0.0415	6
2	0.305	0.225	0.09	0.1465	0.063	0.034	0.0415	6
2	0.335	0.255	0.08	0.168	0.079	0.0355	0.05	5
2	0.35	0.26	0.075	0.18	0.09	0.0245	0.055	5
2	0.355	0.27	0.075	0.1775	0.079	0.0315	0.054	6
2	0.355	0.26	0.09	0.1985	0.0715	0.0495	0.058	7
2	0.36	0.27	0.095	0.2	0.073	0.056	0.061	8
2	0.36	0.275	0.075	0.2205	0.0985	0.044	0.066	7
2	0.36	0.265	0.075	0.1845	0.083	0.0365	0.055	7
2	0.365	0.27	0.085	0.2225	0.0935	0.0525	0.066	7
2	0.37	0.27	0.095	0.2175	0.097	0.046	0.065	6
2	0.375	0.28	0.08	0.2165	0.0935	0.0925	0.07	7
2	0.38	0.285	0.095	0.243	0.0895	0.0665	0.075	7
2	0.38	0.29	0.1	0.237	0.108	0.0395	0.082	6
2	0.385	0.29	0.09	0.2365	0.1	0.0505	0.076	8
2	0.385	0.28	0.095	0.257	0.119	0.059	0.07	7
2	0.385	0.3	0.09	0.308	0.1525	0.056	0.0835	8
2	0.39	0.3	0.09	0.252	0.1065	0.053	0.08	7
2	0.39	0.285	0.1	0.281	0.1275	0.062	0.077	7
2	0.39	0.29	0.1	0.2225	0.095	0.0465	0.073	7
2	0.41	0.3	0.09	0.304	0.129	0.071	0.0955	8
2	0.41	0.3	0.09	0.28	0.141	0.0575	0.075	8
2	0.415	0.325	0.1	0.313	0.139	0.0625	0.0965	7
2	0.425	0.325	0.11	0.317	0.135	0.048	0.09	8
2	0.425	0.315	0.08	0.303	0.131	0.0585	0.095	7
2	0.435	0.335	0.1	0.3295	0.129	0.07	0.11	7
2	0.435	0.325	0.11	0.367	0.1595	0.08	0.105	6
2	0.45	0.34	0.095	0.3245	0.1385	0.064	0.105	8
2	0.45	0.335	0.11	0.4195	0.181	0.085	0.1345	7
2	0.455	0.36	0.115	0.457	0.2085	0.0855	0.147	10
2	0.46	0.35	0.11	0.4	0.176	0.083	0.1205	7
2	0.46	0.355	0.11	0.4255	0.2015	0.081	0.13	7
2	0.465	0.37	0.12	0.4365	0.188	0.0815	0.147	9
2	0.465	0.345	0.11	0.393	0.1825	0.0735	0.12	8
2	0.47	0.355	0.125	0.499	0.21	0.0985	0.155	8
2	0.475	0.36	0.145	0.6325	0.2825	0.137	0.19	8
0	0.475	0.36	0.1	0.4285	0.1965	0.099	0.112	7
2	0.475	0.36	0.125	0.4905	0.205	0.1305	0.125	8
2	0.48	0.37	0.125	0.474	0.179	0.1035	0.175	9
2	0.48	0.37	0.12	0.536	0.251	0.114	0.15	8
0	0.48	0.355	0.16	0.464	0.221	0.106	0.239	8
2	0.485	0.375	0.13	0.6025	0.2935	0.1285	0.16	7
2	0.49	0.375	0.115	0.4615	0.204	0.0945	0.143	8
2	0.49	0.4	0.135	0.624	0.3035	0.1285	0.169	8
2	0.495	0.37	0.125	0.4715	0.2075	0.091	0.15	8
2	0.495	0.4	0.105	0.602	0.2505	0.1265	0.19	8
2	0.5	0.4	0.12	0.616	0.261	0.143	0.1935	8
2	0.5	0.39	0.12	0.5955	0.2455	0.147	0.173	8
2	0.5	0.375	0.14	0.559	0.2375	0.135	0.169	9
2	0.51	0.395	0.13	0.6025	0.281	0.143	0.162	7
1	0.515	0.375	0.11	0.6065	0.3005	0.131	0.15	6
2	0.515	0.36	0.125	0.4725	0.1815	0.125	0.138	9
2	0.515	0.35	0.105	0.4745	0.213	0.123	0.1275	10
2	0.515	0.395	0.125	0.6635	0.32	0.14	0.17	8
2	0.515	0.39	0.125	0.5705	0.238	0.1265	0.185	8
2	0.52	0.41	0.145	0.646	0.2965	0.1595	0.165	9
2	0.52	0.39	0.13	0.5545	0.2355	0.1095	0.1895	7
0	0.525	0.415	0.145	0.845	0.3525	0.1635	0.2875	8
2	0.525	0.39	0.12	0.664	0.3115	0.147	0.178	9
2	0.525	0.38	0.135	0.615	0.261	0.159	0.175	8
2	0.525	0.4	0.14	0.654	0.305	0.16	0.169	7
0	0.525	0.4	0.155	0.707	0.282	0.1605	0.225	9
2	0.53	0.42	0.12	0.5965	0.2555	0.141	0.177	7
2	0.53	0.43	0.135	0.6255	0.245	0.1455	0.2135	10
2	0.53	0.4	0.145	0.555	0.1935	0.1305	0.195	9
2	0.53	0.42	0.13	0.8365	0.3745	0.167	0.249	11
2	0.535	0.4	0.13	0.657	0.2835	0.162	0.175	7
2	0.54	0.43	0.17	0.836	0.3725	0.1815	0.24	9
2	0.54	0.425	0.14	0.742	0.32	0.1395	0.25	9
2	0.54	0.43	0.14	0.8195	0.3935	0.1725	0.2295	9
0	0.54	0.455	0.14	0.972	0.419	0.255	0.269	10
2	0.54	0.42	0.14	0.6275	0.2505	0.1175	0.235	9
2	0.54	0.425	0.13	0.7205	0.2955	0.169	0.225	10
2	0.54	0.425	0.135	0.686	0.3475	0.1545	0.213	8
2	0.545	0.4	0.13	0.686	0.3285	0.1455	0.18	9
2	0.545	0.375	0.12	0.543	0.2375	0.1155	0.1725	8
2	0.545	0.42	0.125	0.717	0.358	0.112	0.22	8
0	0.55	0.435	0.14	0.7625	0.327	0.1685	0.259	10
2	0.55	0.425	0.15	0.639	0.269	0.1345	0.217	9
2	0.55	0.42	0.135	0.816	0.3995	0.1485	0.23	12
2	0.55	0.415	0.145	0.7815	0.373	0.16	0.2215	8
2	0.55	0.425	0.15	0.7665	0.339	0.176	0.21	8
2	0.555	0.395	0.13	0.5585	0.222	0.1245	0.17	9
2	0.555	0.435	0.14	0.765	0.3945	0.15	0.206	8
2	0.555	0.46	0.145	0.9005	0.3845	0.158	0.2765	11
2	0.56	0.445	0.15	0.8225	0.3685	0.187	0.236	10
2	0.56	0.44	0.13	0.7235	0.349	0.149	0.2	8
0	0.56	0.425	0.135	0.849	0.3265	0.221	0.2645	10
2	0.565	0.42	0.155	0.743	0.31	0.186	0.231	9
1	0.565	0.44	0.15	0.863	0.435	0.149	0.27	9
0	0.565	0.44	0.125	0.802	0.3595	0.1825	0.215	9
0	0.565	0.43	0.15	0.831	0.4245	0.1735	0.219	10
1	0.57	0.45	0.135	0.7805	0.3345	0.185	0.21	8
0	0.57	0.45	0.14	0.795	0.3385	0.148	0.245	9
2	0.57	0.435	0.17	0.848	0.4	0.166	0.25	9
2	0.57	0.43	0.145	0.833	0.354	0.144	0.2815	10
2	0.57	0.445	0.155	0.867	0.3705	0.1705	0.28	9
2	0.57	0.445	0.145	0.7405	0.306	0.172	0.1825	12
0	0.575	0.455	0.165	0.867	0.3765	0.1805	0.268	8
2	0.575	0.425	0.135	0.7965	0.364	0.196	0.239	10
1	0.575	0.47	0.155	1.116	0.509	0.238	0.34	10
2	0.575	0.45	0.125	0.78	0.3275	0.188	0.235	9
0	0.575	0.47	0.185	0.985	0.3745	0.2175	0.355	10
1	0.575	0.465	0.195	0.9965	0.417	0.247	0.47	8
2	0.575	0.445	0.17	0.8015	0.3475	0.1465	0.25	9
2	0.575	0.45	0.135	0.807	0.3615	0.176	0.254	10
1	0.575	0.435	0.15	1.0305	0.4605	0.218	0.36	8
0	0.575	0.445	0.16	0.839	0.4005	0.198	0.239	9
0	0.575	0.44	0.16	0.9615	0.483	0.166	0.275	13
1	0.58	0.435	0.15	0.834	0.428	0.1515	0.23	8
0	0.58	0.46	0.155	1.0335	0.469	0.2225	0.295	10
0	0.58	0.43	0.13	0.798	0.365	0.173	0.2285	10
2	0.58	0.445	0.125	0.7095	0.303	0.1405	0.235	9
1	0.585	0.445	0.14	0.913	0.4305	0.2205	0.253	10
0	0.59	0.49	0.165	1.207	0.559	0.235	0.309	10
2	0.59	0.45	0.145	1.022	0.428	0.268	0.265	10
2	0.59	0.46	0.145	0.9015	0.419	0.1785	0.26	11
1	0.595	0.435	0.15	0.9	0.4175	0.17	0.265	8
0	0.595	0.45	0.14	0.838	0.3965	0.194	0.217	10
0	0.595	0.45	0.145	0.959	0.463	0.2065	0.2535	10
2	0.595	0.46	0.15	0.8335	0.377	0.1925	0.235	8
1	0.6	0.46	0.155	0.9735	0.427	0.2045	0.3	8
1	0.6	0.475	0.15	1.13	0.575	0.196	0.305	9
0	0.6	0.48	0.165	0.9165	0.4135	0.1965	0.2725	9
2	0.6	0.48	0.17	0.9175	0.38	0.2225	0.29	8
1	0.6	0.48	0.18	1.0645	0.4495	0.2455	0.325	10
0	0.6	0.47	0.165	1.059	0.504	0.241	0.275	9
0	0.6	0.47	0.16	1.194	0.5625	0.3045	0.2635	10
1	0.605	0.455	0.145	0.9775	0.468	0.1775	0.275	9
0	0.605	0.475	0.145	0.884	0.3835	0.1905	0.27	8
2	0.605	0.47	0.145	0.8025	0.379	0.2265	0.22	9
1	0.605	0.48	0.14	0.991	0.4735	0.2345	0.24	8
1	0.605	0.47	0.155	0.974	0.393	0.224	0.3345	9
1	0.605	0.505	0.18	1.434	0.7285	0.264	0.431	11
0	0.61	0.475	0.155	0.983	0.4565	0.228	0.266	10
1	0.61	0.465	0.16	1.0725	0.4835	0.2515	0.28	10
1	0.61	0.485	0.15	1.2405	0.6025	0.2915	0.3085	12
0	0.61	0.47	0.16	1.022	0.449	0.2345	0.2945	9
1	0.61	0.475	0.16	1.1155	0.3835	0.223	0.379	10
2	0.61	0.465	0.125	0.9225	0.436	0.19	0.26	9
0	0.61	0.47	0.17	1.1185	0.5225	0.2405	0.31	9
1	0.61	0.485	0.18	1.2795	0.5735	0.2855	0.355	7
0	0.615	0.47	0.16	1.0175	0.473	0.2395	0.28	10
0	0.615	0.475	0.175	1.224	0.6035	0.261	0.311	9
2	0.62	0.485	0.18	1.154	0.4935	0.256	0.315	12
1	0.62	0.515	0.155	1.3255	0.6685	0.2605	0.335	12
0	0.62	0.515	0.175	1.221	0.535	0.241	0.395	13
1	0.62	0.54	0.165	1.139	0.4995	0.2435	0.357	11
2	0.62	0.49	0.16	1.066	0.446	0.246	0.305	11
1	0.62	0.48	0.18	1.2215	0.582	0.2695	0.313	12
2	0.62	0.47	0.14	0.8565	0.3595	0.16	0.295	9
2	0.62	0.45	0.135	0.924	0.358	0.2265	0.2965	10
0	0.62	0.48	0.15	1.266	0.6285	0.2575	0.309	12
1	0.62	0.48	0.175	1.0405	0.464	0.2225	0.3	9
0	0.625	0.49	0.165	1.1165	0.4895	0.2615	0.3325	11
0	0.625	0.475	0.16	1.0845	0.5005	0.2355	0.3105	10
0	0.625	0.5	0.17	1.0985	0.4645	0.22	0.354	9
2	0.625	0.47	0.155	1.1955	0.643	0.2055	0.3145	12
1	0.625	0.485	0.175	1.362	0.6765	0.2615	0.3705	10
2	0.625	0.485	0.15	1.044	0.438	0.2865	0.278	9
0	0.63	0.505	0.17	1.0915	0.4615	0.266	0.3	9
1	0.63	0.5	0.18	1.1965	0.514	0.2325	0.3995	8
0	0.63	0.49	0.17	1.1745	0.5255	0.273	0.339	11
0	0.63	0.485	0.165	1.233	0.6565	0.2315	0.3035	10
0	0.63	0.495	0.175	1.2695	0.605	0.271	0.328	11
2	0.635	0.5	0.165	1.489	0.715	0.3445	0.3615	13
0	0.635	0.5	0.17	1.4345	0.611	0.309	0.418	12
1	0.635	0.49	0.175	1.2435	0.5805	0.313	0.305	10
1	0.635	0.49	0.17	1.2615	0.5385	0.2665	0.38	9
1	0.64	0.505	0.165	1.2235	0.5215	0.2695	0.36	10
0	0.64	0.515	0.18	1.247	0.5475	0.2925	0.3685	10
0	0.64	0.525	0.185	1.707	0.763	0.4205	0.4435	11
0	0.645	0.505	0.15	1.1605	0.519	0.2615	0.335	10
0	0.645	0.5	0.175	1.286	0.5645	0.288	0.386	12
0	0.645	0.5	0.19	1.5595	0.741	0.3715	0.3845	14
0	0.645	0.51	0.19	1.4745	0.605	0.345	0.48	9
0	0.645	0.51	0.195	1.226	0.5885	0.2215	0.3745	10
0	0.645	0.51	0.16	1.33	0.6665	0.309	0.317	9
1	0.645	0.51	0.16	1.2415	0.5815	0.276	0.315	9
0	0.645	0.5	0.175	1.3375	0.554	0.308	0.415	10
1	0.645	0.51	0.19	1.363	0.573	0.362	0.36	10
0	0.645	0.485	0.15	1.2215	0.5695	0.2735	0.33	9
1	0.645	0.48	0.19	1.371	0.6925	0.2905	0.35	12
1	0.65	0.495	0.155	1.337	0.615	0.3195	0.335	9
0	0.65	0.505	0.19	1.274	0.59	0.23	0.391	11
0	0.65	0.525	0.185	1.488	0.665	0.337	0.378	11
0	0.65	0.51	0.16	1.3835	0.6385	0.2905	0.3665	9
0	0.655	0.55	0.18	1.274	0.586	0.281	0.365	10
1	0.655	0.51	0.15	1.043	0.4795	0.223	0.305	9
1	0.655	0.505	0.19	1.3485	0.5935	0.2745	0.425	12
1	0.655	0.505	0.195	1.4405	0.688	0.3805	0.363	11
0	0.66	0.5	0.165	1.3195	0.667	0.269	0.341	9
1	0.66	0.535	0.175	1.5175	0.711	0.3125	0.415	12
0	0.66	0.53	0.195	1.5505	0.6505	0.3295	0.495	10
0	0.66	0.51	0.165	1.6375	0.7685	0.3545	0.3925	14
0	0.665	0.525	0.175	1.443	0.6635	0.3845	0.353	11
0	0.665	0.505	0.16	1.289	0.6145	0.253	0.3665	11
1	0.665	0.505	0.16	1.2915	0.631	0.2925	0.32	11
0	0.665	0.52	0.175	1.3725	0.606	0.32	0.395	12
0	0.665	0.5	0.175	1.2975	0.6075	0.314	0.315	9
0	0.67	0.505	0.16	1.2585	0.6255	0.311	0.308	12
0	0.67	0.52	0.165	1.39	0.711	0.2865	0.3	11
1	0.67	0.52	0.19	1.32	0.5235	0.3095	0.4275	13
1	0.67	0.55	0.155	1.566	0.858	0.339	0.354	10
1	0.67	0.54	0.195	1.619	0.74	0.3305	0.465	11
0	0.675	0.525	0.16	1.2835	0.572	0.2755	0.3545	13
1	0.675	0.51	0.195	1.382	0.6045	0.3175	0.3965	10
0	0.68	0.52	0.195	1.4535	0.592	0.391	0.4125	10
1	0.68	0.51	0.2	1.6075	0.714	0.339	0.4705	11
0	0.685	0.52	0.15	1.3735	0.7185	0.293	0.32	11
1	0.685	0.565	0.175	1.638	0.7775	0.375	0.438	11
1	0.69	0.55	0.2	1.569	0.687	0.3675	0.46	12
0	0.7	0.565	0.175	1.8565	0.8445	0.3935	0.54	10
1	0.7	0.535	0.175	1.773	0.6805	0.48	0.512	15
1	0.705	0.545	0.17	1.58	0.6435	0.4565	0.265	11
0	0.71	0.575	0.215	2.009	0.9895	0.4475	0.502	11
1	0.71	0.57	0.195	1.9805	0.9925	0.4925	0.48	12
1	0.71	0.54	0.205	1.5805	0.802	0.287	0.435	10
0	0.71	0.56	0.22	2.015	0.9215	0.454	0.566	11
0	0.72	0.57	0.2	1.8275	0.919	0.366	0.485	10
0	0.72	0.55	0.205	2.125	1.1455	0.4425	0.511	13
1	0.72	0.525	0.18	1.445	0.631	0.3215	0.435	7
1	0.725	0.565	0.21	2.1425	1.03	0.487	0.503	14
1	0.73	0.56	0.19	1.9425	0.799	0.5195	0.5655	11
0	0.735	0.59	0.215	1.747	0.7275	0.403	0.557	11
1	0.74	0.565	0.205	2.119	0.9655	0.5185	0.482	12
1	0.75	0.565	0.215	1.938	0.7735	0.4825	0.575	11
0	0.75	0.595	0.205	2.2205	1.083	0.421	0.63	12
0	0.77	0.62	0.195	2.5155	1.1155	0.6415	0.642	12
0	0.775	0.63	0.25	2.7795	1.3485	0.76	0.578	12
2	0.275	0.175	0.09	0.2315	0.096	0.057	0.0705	5
2	0.375	0.245	0.1	0.394	0.166	0.091	0.1125	6
1	0.375	0.27	0.135	0.597	0.272	0.131	0.1675	7
0	0.39	0.28	0.125	0.564	0.3035	0.0955	0.143	7
2	0.435	0.3	0.12	0.5965	0.259	0.139	0.1645	8
0	0.445	0.32	0.12	0.414	0.199	0.09	0.117	7
2	0.455	0.335	0.105	0.422	0.229	0.0865	0.1	6
2	0.455	0.325	0.135	0.82	0.4005	0.1715	0.211	8
2	0.455	0.345	0.11	0.434	0.207	0.0855	0.1215	8
2	0.465	0.325	0.14	0.7615	0.362	0.1535	0.209	10
0	0.465	0.36	0.115	0.5795	0.295	0.1395	0.12	7
2	0.485	0.365	0.105	0.5205	0.195	0.123	0.182	8
0	0.485	0.37	0.155	0.968	0.419	0.2455	0.2365	9
2	0.485	0.345	0.16	0.869	0.3085	0.185	0.319	9
1	0.49	0.355	0.16	0.8795	0.3485	0.215	0.2825	8
0	0.5	0.37	0.15	1.0615	0.494	0.223	0.296	9
0	0.515	0.35	0.155	0.9225	0.4185	0.198	0.273	9
0	0.515	0.395	0.135	1.007	0.472	0.2495	0.252	8
0	0.525	0.365	0.17	0.9605	0.438	0.2225	0.276	10
0	0.525	0.38	0.125	0.65	0.303	0.155	0.159	7
0	0.53	0.41	0.14	0.7545	0.3495	0.1715	0.2105	8
1	0.535	0.425	0.135	0.771	0.3765	0.1815	0.1795	8
2	0.535	0.385	0.18	1.0835	0.4955	0.2295	0.304	8
2	0.545	0.42	0.165	0.8935	0.4235	0.2195	0.228	8
1	0.545	0.415	0.2	1.358	0.567	0.318	0.403	10
1	0.545	0.385	0.15	1.1185	0.5425	0.2445	0.2845	9
1	0.55	0.38	0.165	1.205	0.543	0.294	0.3345	10
0	0.55	0.42	0.16	1.3405	0.6325	0.311	0.344	10
0	0.57	0.455	0.175	1.02	0.4805	0.2145	0.29	9
0	0.575	0.44	0.185	1.025	0.5075	0.2245	0.2485	10
2	0.575	0.45	0.13	0.8145	0.403	0.1715	0.213	10
1	0.58	0.43	0.17	1.48	0.6535	0.324	0.4155	10
0	0.585	0.455	0.145	0.953	0.3945	0.2685	0.258	10
2	0.585	0.45	0.15	0.8915	0.3975	0.2035	0.253	8
0	0.6	0.495	0.175	1.3005	0.6195	0.284	0.3285	11
0	0.6	0.465	0.165	1.038	0.4975	0.2205	0.251	9
0	0.605	0.475	0.175	1.2525	0.5575	0.3055	0.343	9
0	0.605	0.475	0.15	1.15	0.575	0.232	0.297	10
1	0.61	0.475	0.15	1.1135	0.5195	0.2575	0.3005	11
1	0.615	0.455	0.145	1.1155	0.5045	0.238	0.315	10
0	0.62	0.47	0.145	1.0865	0.511	0.2715	0.2565	10
0	0.625	0.495	0.175	1.254	0.5815	0.286	0.3185	9
0	0.625	0.49	0.185	1.169	0.5275	0.2535	0.344	11
0	0.635	0.495	0.195	1.172	0.445	0.3115	0.3475	11
1	0.635	0.475	0.15	1.1845	0.533	0.307	0.291	10
1	0.64	0.475	0.14	1.0725	0.4895	0.2295	0.31	8
0	0.645	0.5	0.16	1.3815	0.672	0.326	0.315	9
0	0.65	0.525	0.19	1.6125	0.777	0.3685	0.3965	11
0	0.65	0.485	0.16	1.7395	0.5715	0.2785	0.3075	10
1	0.655	0.52	0.2	1.5475	0.713	0.314	0.466	9
0	0.655	0.545	0.19	1.4245	0.6325	0.333	0.378	10
1	0.665	0.515	0.185	1.3405	0.5595	0.293	0.4375	11
1	0.675	0.53	0.175	1.4465	0.6775	0.33	0.389	10
1	0.685	0.535	0.175	1.5845	0.7175	0.3775	0.4215	9
1	0.695	0.55	0.185	1.679	0.805	0.4015	0.3965	10
0	0.695	0.53	0.19	1.726	0.7625	0.436	0.455	11
1	0.705	0.545	0.18	1.5395	0.6075	0.3675	0.4645	13
1	0.72	0.55	0.195	2.073	1.0715	0.4265	0.5015	9
0	0.72	0.56	0.18	1.5865	0.691	0.375	0.4425	11
0	0.73	0.575	0.21	2.069	0.9285	0.409	0.643	11
2	0.185	0.135	0.04	0.027	0.0105	0.0055	0.009	5
2	0.24	0.18	0.055	0.0555	0.0235	0.013	0.018	4
2	0.31	0.215	0.075	0.1275	0.0565	0.0275	0.036	7
2	0.34	0.26	0.085	0.1885	0.0815	0.0335	0.06	6
2	0.35	0.265	0.08	0.2	0.09	0.042	0.06	7
2	0.365	0.27	0.085	0.197	0.0815	0.0325	0.065	6
2	0.365	0.275	0.085	0.223	0.098	0.0375	0.075	7
2	0.365	0.27	0.075	0.2215	0.095	0.0445	0.07	6
2	0.39	0.31	0.105	0.2665	0.1185	0.0525	0.081	8
2	0.405	0.3	0.09	0.269	0.103	0.067	0.11	6
2	0.41	0.315	0.095	0.2805	0.114	0.0345	0.11	7
2	0.41	0.335	0.105	0.3305	0.1405	0.064	0.105	7
2	0.415	0.31	0.09	0.2815	0.1245	0.0615	0.085	6
2	0.415	0.31	0.1	0.2805	0.114	0.0565	0.0975	6
2	0.415	0.31	0.095	0.311	0.1125	0.0625	0.115	8
2	0.42	0.325	0.1	0.368	0.1675	0.0625	0.1135	11
2	0.43	0.34	0.1	0.3405	0.1395	0.0665	0.12	8
2	0.435	0.335	0.1	0.3245	0.135	0.0785	0.098	7
2	0.435	0.33	0.11	0.38	0.1515	0.0945	0.11	7
2	0.435	0.33	0.105	0.335	0.156	0.0555	0.105	8
2	0.435	0.345	0.12	0.3215	0.13	0.056	0.1185	7
2	0.445	0.33	0.11	0.358	0.1525	0.067	0.1185	8
2	0.465	0.37	0.11	0.445	0.1635	0.096	0.166	7
2	0.47	0.375	0.12	0.487	0.196	0.099	0.135	8
2	0.475	0.34	0.105	0.4535	0.203	0.08	0.1465	9
2	0.485	0.385	0.13	0.568	0.2505	0.178	0.154	7
2	0.485	0.36	0.12	0.5155	0.2465	0.1025	0.147	8
2	0.485	0.37	0.115	0.457	0.1885	0.0965	0.15	9
2	0.495	0.38	0.135	0.5095	0.2065	0.1165	0.165	8
2	0.495	0.38	0.145	0.5	0.205	0.148	0.1505	8
2	0.495	0.375	0.14	0.494	0.181	0.0975	0.191	8
2	0.5	0.38	0.11	0.5605	0.28	0.106	0.15	9
2	0.505	0.405	0.13	0.599	0.2245	0.1175	0.225	11
2	0.505	0.4	0.145	0.7045	0.334	0.1425	0.207	8
1	0.51	0.4	0.12	0.7005	0.347	0.1105	0.195	10
2	0.515	0.415	0.135	0.7125	0.285	0.152	0.245	10
2	0.515	0.42	0.15	0.6725	0.2555	0.1335	0.235	10
0	0.515	0.385	0.11	0.5785	0.253	0.16	0.14	8
2	0.52	0.41	0.11	0.5185	0.2165	0.0915	0.184	8
2	0.52	0.415	0.14	0.6375	0.308	0.1335	0.168	9
2	0.52	0.395	0.125	0.5805	0.2445	0.146	0.165	9
2	0.52	0.38	0.115	0.6645	0.3285	0.17	0.1425	7
2	0.52	0.385	0.115	0.581	0.2555	0.156	0.143	10
2	0.525	0.415	0.12	0.596	0.2805	0.12	0.1695	9
2	0.525	0.405	0.145	0.6965	0.3045	0.1535	0.21	8
2	0.525	0.4	0.145	0.6095	0.248	0.159	0.175	9
2	0.53	0.43	0.14	0.677	0.298	0.0965	0.23	8
2	0.53	0.43	0.16	0.7245	0.321	0.1275	0.24	9
2	0.53	0.395	0.13	0.575	0.247	0.115	0.183	9
2	0.53	0.405	0.12	0.632	0.2715	0.148	0.1875	9
2	0.535	0.455	0.14	1.0015	0.53	0.1765	0.244	9
1	0.54	0.425	0.16	0.9455	0.3675	0.2005	0.295	9
2	0.54	0.395	0.135	0.6555	0.2705	0.155	0.192	9
2	0.54	0.39	0.125	0.6255	0.2525	0.158	0.19	8
2	0.545	0.425	0.14	0.8145	0.305	0.231	0.244	10
2	0.545	0.43	0.14	0.687	0.2615	0.1405	0.25	9
2	0.55	0.435	0.14	0.7995	0.295	0.1905	0.238	10
2	0.55	0.45	0.13	0.804	0.3375	0.1405	0.23	6
0	0.555	0.435	0.14	0.7495	0.341	0.1645	0.214	8
0	0.555	0.41	0.125	0.599	0.2345	0.1465	0.194	8
0	0.555	0.4	0.13	0.7075	0.332	0.1585	0.18	7
2	0.555	0.45	0.175	0.738	0.304	0.1755	0.22	9
0	0.555	0.455	0.135	0.837	0.382	0.171	0.235	9
2	0.56	0.445	0.165	0.832	0.3455	0.179	0.279	9
1	0.565	0.445	0.125	0.8305	0.3135	0.1785	0.23	11
0	0.565	0.415	0.125	0.667	0.302	0.1545	0.185	7
0	0.565	0.455	0.155	0.9355	0.421	0.183	0.26	11
2	0.565	0.435	0.145	0.8445	0.3975	0.158	0.255	9
0	0.565	0.45	0.16	0.895	0.415	0.195	0.246	9
2	0.565	0.46	0.155	0.8715	0.3755	0.215	0.25	10
0	0.57	0.46	0.155	1.0005	0.454	0.205	0.265	11
0	0.57	0.455	0.155	0.832	0.3585	0.174	0.277	11
0	0.57	0.44	0.175	0.9415	0.3805	0.2285	0.283	9
0	0.57	0.415	0.13	0.88	0.4275	0.1955	0.238	13
1	0.57	0.44	0.12	0.803	0.382	0.1525	0.234	9
0	0.575	0.45	0.13	0.785	0.318	0.193	0.2265	9
0	0.575	0.45	0.155	0.9765	0.495	0.2145	0.235	9
0	0.575	0.435	0.135	0.992	0.432	0.2225	0.239	10
0	0.575	0.455	0.155	1.013	0.4685	0.2085	0.295	11
0	0.575	0.445	0.145	0.876	0.3795	0.1615	0.27	10
1	0.575	0.465	0.175	1.099	0.4735	0.202	0.35	9
2	0.575	0.45	0.135	0.8715	0.45	0.162	0.225	10
2	0.575	0.45	0.135	0.8245	0.3375	0.2115	0.239	11
1	0.575	0.43	0.155	0.7955	0.3485	0.1925	0.22	9
0	0.575	0.475	0.145	0.857	0.3665	0.173	0.269	9
1	0.58	0.45	0.195	0.8265	0.4035	0.173	0.225	9
1	0.58	0.5	0.165	0.925	0.37	0.185	0.3005	10
0	0.58	0.44	0.15	1.0465	0.518	0.2185	0.2795	10
2	0.58	0.44	0.145	0.7905	0.3525	0.1645	0.242	10
0	0.58	0.44	0.16	0.8295	0.3365	0.2005	0.2485	9
0	0.595	0.455	0.15	0.886	0.4315	0.201	0.223	10
1	0.6	0.47	0.135	0.97	0.4655	0.1955	0.264	11
0	0.6	0.46	0.17	1.1805	0.456	0.337	0.329	11
0	0.6	0.475	0.15	0.99	0.386	0.2195	0.3105	10
1	0.6	0.465	0.16	1.133	0.466	0.2885	0.298	11
2	0.605	0.49	0.165	1.071	0.482	0.1935	0.352	10
1	0.605	0.455	0.145	0.862	0.334	0.1985	0.3	9
0	0.605	0.47	0.18	1.1155	0.479	0.2565	0.321	10
0	0.61	0.48	0.14	1.031	0.4375	0.2615	0.27	8
1	0.61	0.46	0.145	1.1185	0.478	0.2945	0.2985	10
1	0.61	0.46	0.155	0.957	0.4255	0.1975	0.265	8
1	0.61	0.47	0.165	1.1785	0.566	0.2785	0.294	11
0	0.615	0.47	0.145	1.0285	0.4435	0.2825	0.285	11
0	0.615	0.47	0.15	1.0875	0.4975	0.283	0.2685	9
1	0.615	0.495	0.16	1.255	0.5815	0.3195	0.3225	12
0	0.615	0.495	0.2	1.219	0.564	0.227	0.3885	10
0	0.62	0.49	0.16	1.035	0.44	0.2525	0.285	11
0	0.62	0.49	0.15	1.195	0.4605	0.302	0.355	9
1	0.62	0.495	0.17	1.062	0.372	0.213	0.34	11
0	0.62	0.495	0.195	1.5145	0.579	0.346	0.5195	15
0	0.62	0.47	0.15	1.309	0.587	0.4405	0.325	9
0	0.62	0.485	0.155	1.0295	0.425	0.2315	0.335	12
0	0.625	0.495	0.155	1.0485	0.487	0.212	0.3215	11
0	0.625	0.515	0.17	1.331	0.5725	0.3005	0.361	9
0	0.625	0.505	0.185	1.1565	0.52	0.2405	0.3535	10
1	0.625	0.445	0.16	1.09	0.46	0.2965	0.304	11
1	0.625	0.52	0.18	1.354	0.4845	0.351	0.375	11
1	0.625	0.47	0.145	0.984	0.475	0.2	0.265	11
0	0.63	0.49	0.155	1.2525	0.63	0.246	0.289	9
1	0.635	0.485	0.165	1.2695	0.5635	0.3065	0.3395	11
1	0.635	0.52	0.165	1.3405	0.5065	0.296	0.412	11
1	0.635	0.505	0.155	1.2895	0.594	0.314	0.345	11
0	0.635	0.525	0.16	1.195	0.5435	0.246	0.335	12
0	0.635	0.5	0.165	1.273	0.6535	0.213	0.365	12
0	0.635	0.515	0.165	1.229	0.5055	0.2975	0.3535	10
0	0.64	0.53	0.165	1.1895	0.4765	0.3	0.35	11
1	0.64	0.48	0.145	1.1145	0.508	0.24	0.34	10
1	0.64	0.515	0.165	1.3115	0.4945	0.2555	0.41	10
2	0.64	0.49	0.135	1.1	0.488	0.2505	0.2925	10
0	0.64	0.49	0.155	1.1285	0.477	0.269	0.34	9
1	0.64	0.485	0.185	1.4195	0.6735	0.3465	0.3255	11
1	0.645	0.51	0.18	1.6195	0.7815	0.322	0.4675	12
0	0.645	0.49	0.175	1.32	0.6525	0.2375	0.3385	11
1	0.645	0.52	0.21	1.5535	0.616	0.3655	0.474	16
2	0.65	0.52	0.15	1.238	0.5495	0.296	0.3305	10
1	0.65	0.51	0.155	1.189	0.483	0.278	0.3645	13
1	0.65	0.51	0.185	1.375	0.531	0.384	0.3985	10
1	0.655	0.515	0.18	1.412	0.6195	0.2485	0.497	11
1	0.655	0.525	0.175	1.348	0.5855	0.2605	0.394	10
0	0.655	0.52	0.17	1.1445	0.53	0.223	0.348	9
1	0.66	0.535	0.205	1.4415	0.5925	0.2775	0.49	10
0	0.66	0.51	0.175	1.218	0.5055	0.303	0.37	11
1	0.665	0.5	0.15	1.2475	0.4625	0.2955	0.3595	10
0	0.665	0.515	0.2	1.2695	0.5115	0.2675	0.436	12
0	0.665	0.525	0.18	1.429	0.6715	0.29	0.4	12
1	0.67	0.53	0.205	1.4015	0.643	0.2465	0.416	12
0	0.675	0.515	0.15	1.312	0.556	0.2845	0.4115	11
1	0.675	0.51	0.185	1.473	0.6295	0.3025	0.4245	11
0	0.68	0.54	0.19	1.623	0.7165	0.354	0.4715	12
0	0.68	0.54	0.155	1.534	0.671	0.379	0.384	10
0	0.685	0.535	0.155	1.3845	0.6615	0.2145	0.4075	10
0	0.69	0.55	0.18	1.6915	0.6655	0.402	0.5	11
0	0.695	0.545	0.185	1.5715	0.6645	0.3835	0.4505	13
1	0.7	0.575	0.205	1.773	0.605	0.447	0.538	13
0	0.7	0.55	0.175	1.4405	0.6565	0.2985	0.375	12
0	0.7	0.55	0.195	1.6245	0.675	0.347	0.535	13
1	0.705	0.535	0.22	1.866	0.929	0.3835	0.4395	10
1	0.72	0.575	0.18	1.6705	0.732	0.3605	0.501	12
0	0.72	0.565	0.19	2.081	1.0815	0.4305	0.503	11
1	0.725	0.57	0.205	1.6195	0.744	0.315	0.488	11
1	0.75	0.55	0.195	1.8325	0.83	0.366	0.44	11
0	0.76	0.605	0.215	2.173	0.801	0.4915	0.646	13
2	0.135	0.13	0.04	0.029	0.0125	0.0065	0.008	4
2	0.16	0.11	0.025	0.0195	0.0075	0.005	0.006	4
2	0.21	0.15	0.055	0.0465	0.017	0.012	0.015	5
2	0.28	0.21	0.075	0.1195	0.053	0.0265	0.03	6
2	0.28	0.2	0.065	0.0895	0.036	0.0185	0.03	7
2	0.285	0.215	0.06	0.0935	0.031	0.023	0.03	6
2	0.29	0.21	0.07	0.1115	0.048	0.0205	0.03	5
2	0.29	0.21	0.06	0.1195	0.056	0.0235	0.03	6
2	0.29	0.21	0.065	0.097	0.0375	0.022	0.03	6
2	0.32	0.24	0.07	0.133	0.0585	0.0255	0.041	6
2	0.325	0.25	0.07	0.1745	0.0875	0.0355	0.04	7
2	0.335	0.25	0.08	0.1695	0.0695	0.044	0.0495	6
2	0.35	0.235	0.08	0.17	0.0725	0.0465	0.0495	7
2	0.35	0.25	0.07	0.1605	0.0715	0.0335	0.046	6
[truncated: 2,177 more rows]
