# Supplementary material
Source: ML conference proceedings conference paper supplement (https://proceedings.neurips.cc/paper_files/paper/2022/hash/4f9342b74c3bb63f6e030d8263082ab6-Abstract.html)
Supplement: Supplementary file 1 [file 4f9342b74c3bb63f6e030d8263082ab6-Supplemental-Conference.zip › supplementary/code/data_stat.m]

function [delta_min, H1lin, H1, H2lin, H2] = data_stat(theta, A)
%DATA_STAT
if size(theta, 1) ~= 1
    theta = theta';
end
d = rank(A);
K = size(A, 2);
mu = theta * A;
delta = sort(max(mu) - mu);
delta_min = delta(2);
H1lin = sum( 1 ./ (delta(2 : d) .^ 2)) + 1 / delta_min ^ 2;
H1 = sum( 1 ./ (delta(2 : end) .^ 2)) + 1 / delta_min ^ 2;
H2 = max((2 : K) ./ (delta(2 : end) .^ 2));
H2lin = max((2 : d) ./ (delta(2 : d) .^ 2));
end

% tmp = stats;
% tmp(:, 2) = stats(:, 3);
% tmp(:, 3) = stats(:, 5);
% tmp(:, 4) = stats(:, 2);
% tmp(:, 5) = stats(:, 4);
