# Supplementary material
Source: ML conference proceedings conference paper supplement (https://proceedings.neurips.cc/paper_files/paper/2022/hash/4f9342b74c3bb63f6e030d8263082ab6-Abstract.html)
Supplement: Supplementary file 1 [file 4f9342b74c3bb63f6e030d8263082ab6-Supplemental-Conference.zip › supplementary/code/dataset2_main1.m]

total_time = 1024;
d_range = [2 : 10];
error_probs1 = zeros(length(d_range), 4);
stats = zeros(length(d_range), 5);
for ii = 1 : length(d_range)
    d = d_range(ii);
    error_prob1 = zeros(total_time, 1);
    error_prob2 = zeros(total_time, 1);
    error_prob3 = zeros(total_time, 1);
    error_prob4 = zeros(total_time, 1);
    stat = zeros(total_time, 5);
    parfor jj = 1 : total_time
        K = 3 ^ d;
        T = 2 * K;
        [theta, A] = sphere_data_generator(d, K);
        [delta_min, H1lin, H1, H2lin, H2] = data_stat(theta, A);
        stat(jj, :) = [delta_min, H1lin, H1, H2lin, H2];
        [~ , I] = max(theta' * A);
        best_arm = myalgo(theta, A, T);
        if I ~= best_arm
            error_prob1(jj) = 1;
        end
        best_arm = Sequential_Halving(theta, A, T);
        if I ~= best_arm
            error_prob2(jj) = 1;
        end
        best_arm = BayesGap_Oracle(theta, A, T);
        if I ~= best_arm
            error_prob3(jj) = 1;
        end
        best_arm = BayesGap_Adaptive(theta, A, T);
        if I ~= best_arm
            error_prob4(jj) = 1;
        end
        [jj, d]
    end
    error_probs1(ii, :) = sum([error_prob1, error_prob2, error_prob3, error_prob4]) / total_time;
    stats(ii, :) = mean(stat);
end

figure;
bar(d_range, error_probs1);
xlabel('d');
ylabel('Error probability');
legend({'OD-LinBAI', 'Sequential Halving', 'BayesGap-Oracle', 'BayesGap-Adaptive'}, 'Location', 'southeastoutside');
ylim([0 1]);

%save('c=3.mat','d_range', 'error_probs1', 'stats')
