# Supplementary material
Source: ML conference proceedings conference paper supplement (https://proceedings.neurips.cc/paper_files/paper/2022/hash/4f9342b74c3bb63f6e030d8263082ab6-Abstract.html)
Supplement: Supplementary file 1 [file 4f9342b74c3bb63f6e030d8263082ab6-Supplemental-Conference.zip › supplementary/code/LTS.m]

function best_arm = LTS(theta, A, T)
if size(theta, 1) ~= 1
    theta = theta';
end
%This code is written for the specific dataset. d = 2
K = size(A, 2);
d = size(A, 1);
N = zeros(1, K);
while 1
    A0 = randperm(K, 2);
    if min(eig(A(:, A0(1)) * A(:, A0(1))' + A(:, A0(2)) * A(:, A0(2))')) > 0
        break;
    end
end
cA0 = min(eig(A(:, A0(1)) * A(:, A0(1))' + A(:, A0(2)) * A(:, A0(2))')) / sqrt(d);
i = 0;
V = zeros(d);
tmp = zeros(d, 1);
for t = 1 : T
    if min(eig(V)) < cA0 * sqrt(t)
        a = A0(i + 1);
        i = ~i;
    else
        tmp_min = inf;
        for ii = 1 : K
            if w(ii) > 0
                tmp_tmp = N(1, ii) - t * w(ii);
                if tmp_tmp < tmp_min
                    tmp_min = tmp_tmp;
                    a = ii;
                end
            end
        end
    end
    N(1, a) = N(1, a) + 1;
    V = V + A(:, a) * A(:, a)';
    tmp = tmp + A(:, a) * (theta * A(:, a) + randn);
    theta_hat = pinv(V) * tmp; 
    if t && ~bitand(t, t-1)
        w = XY_allocation(A, theta_hat);
    end
end
reward = theta_hat' * A;
[~, best_arm] = max(reward);
