# Supplementary material
Source: ML conference proceedings conference paper supplement (https://proceedings.neurips.cc/paper_files/paper/2022/hash/4f9342b74c3bb63f6e030d8263082ab6-Abstract.html)
Supplement: Supplementary file 1 [file 4f9342b74c3bb63f6e030d8263082ab6-Supplemental-Conference.zip › supplementary/code/many_sub_data_generator.m]

function [theta, A] = many_sub_data_generator(K)
%MANY_SUB_DATA_GENERATOR

theta = [1; 0];
A = [1, cos(3 * pi / 4); 0, sin(3 * pi / 4)];
for ii = 3 : K
    rand_angle = pi / 4 + 0.09 * randn;
    A = [A, [cos(rand_angle); sin(rand_angle)]];
end
end
