# Supplementary material
Source: ML conference proceedings conference paper supplement (https://proceedings.neurips.cc/paper_files/paper/2022/hash/4f9342b74c3bb63f6e030d8263082ab6-Abstract.html)
Supplement: Supplementary file 1 [file 4f9342b74c3bb63f6e030d8263082ab6-Supplemental-Conference.zip › supplementary/code/readme.txt]

code for:
Minimax Optimal Fixed-Budget Best Arm Identification in Linear Bandits

%%%%%%%%%%%%%%%%%%%%%%%%%%%%%%%%%%%%%%%%%%%%%%%%%%%%%%%%%%%%%%%%%%%%%%%%%%%

Do not distribute.

%%%%%%%%%%%%%%%%%%%%%%%%%%%%%%%%%%%%%%%%%%%%%%%%%%%%%%%%%%%%%%%%%%%%%%%%%%%

dataset1_main1:
The main function for Figure 1.

dataset1_main2:
The main function for Figure 2.

dataset2_main1:
The main function for Figure 3, Table 2 and Table 3.

dataset2_main2:
The main function for Table 4 and Table 5.

real_dataset_main:
The main function for Figure 4.

fixed_confidence_main2:
The main function for Table 6.

myaglo.m:
OD-LinBAI
