# Supplementary material
Source: ML conference proceedings conference paper supplement (https://proceedings.neurips.cc/paper_files/paper/2022/hash/4f9342b74c3bb63f6e030d8263082ab6-Abstract.html)
Supplement: Supplementary file 1 [file 4f9342b74c3bb63f6e030d8263082ab6-Supplemental-Conference.zip › supplementary/code/real_data_generator.m]

function [theta, A] = real_data_generator()
abalonetable = [ones(4177, 1), readmatrix('abalone.csv')];
theta = abalonetable(:, 1:end-1) \ abalonetable(:, end);

[~ , I] = maxk(abalonetable(:, end), 400);
abalonetable = abalonetable(I, :);
A = abalonetable(:, 1:end-1);
A = A' / 10;
end
