# Supplementary material
Source: ML conference proceedings conference paper supplement (https://proceedings.neurips.cc/paper_files/paper/2022/hash/4f9342b74c3bb63f6e030d8263082ab6-Abstract.html)
Supplement: Supplementary file 1 [file 4f9342b74c3bb63f6e030d8263082ab6-Supplemental-Conference.zip › supplementary/code/updateR.m]

function [R,factor,down_err] = updateR(R,factor,xj,lam);

% updates the Cholesky factor R

p=0;
xx = sqrt(abs(lam)*factor) * xj;
if (lam > 0)
    R = cholupdate(R,xx,'+');
else
    [R,p] = cholupdate(R,xx,'-');
end
factor = factor * (1 + lam);
if (p>0)
    down_err=1;
else
    down_err=0;
end
return;
