# Supplementary material
Source: ML conference proceedings conference paper supplement (https://proceedings.neurips.cc/paper_files/paper/2022/hash/4f9342b74c3bb63f6e030d8263082ab6-Abstract.html)
Supplement: Supplementary file 1 [file 4f9342b74c3bb63f6e030d8263082ab6-Supplemental-Conference.zip › supplementary/code/updatevar.m]

 function var = updatevar(var,lam,mult,Mxj,X)

% Update the vector var of variances after a rank-one change

 tmp = Mxj' * X;
 var = (1 + lam) * (var - mult * (tmp.^2));
 return;
