# Supplementary material
Source: ML conference proceedings conference paper supplement (https://proceedings.neurips.cc/paper_files/paper/2022/hash/4f9342b74c3bb63f6e030d8263082ab6-Abstract.html)
Supplement: Supplementary file 1 [file 4f9342b74c3bb63f6e030d8263082ab6-Supplemental-Conference.zip › supplementary/code/usual_data_generator.m]

function [theta, A] = usual_data_generator(d)
%USUAL_DATA_GENERATOR 
A = [eye(d), zeros(d, 1)];
A(1, d + 1) = cos(0.1);
A(2, d + 1) = sin(0.1);
theta = [2; zeros(d - 1, 1)];
end
